# Supplementary material
Source: publisher figshare collection journal article supplement (https://gsajournals.figshare.com/ndownloader/files/12264314)
Supplement: Supplementary file 1 [file 12264314]

## Sheet: Hermaphrodite male shared genes
geneNames	wbgene
3R5.1	WBGene00007065
AH6.5	WBGene00003231
B0001.1	WBGene00003010
B0001.2	WBGene00007087
B0001.3	WBGene00007088
B0001.4	WBGene00007089
B0001.5	WBGene00007090
B0001.6	WBGene00007091
B0001.7	WBGene00007092
B0001.8	WBGene00007093
B0019.2	WBGene00007094
B0024.10	WBGene00007100
B0024.11	WBGene00007101
B0024.12	WBGene00001646
B0024.13	WBGene00007102
B0024.9	WBGene00007099
B0025.1	WBGene00006932
B0025.2	WBGene00000814
B0025.4	WBGene00015001
B0035.1	WBGene00007105
B0035.10	WBGene00001919
B0035.11	WBGene00007110
B0035.12	WBGene00007111
B0035.14	WBGene00001019
B0035.15	WBGene00007113
B0035.16	WBGene00007114
B0035.18	WBGene00044290
B0035.2	WBGene00001020
B0035.3	WBGene00007106
B0035.4	WBGene00007107
B0035.5	WBGene00007108
B0035.6	WBGene00007109
B0035.7	WBGene00001921
B0035.8	WBGene00001922
B0035.9	WBGene00001920
B0041.2	WBGene00015007
B0041.4	WBGene00004415
B0041.5	WBGene00015009
B0041.7	WBGene00006961
B0041.8	WBGene00015011
B0047.2	WBGene00015013
B0047.3	WBGene00015014
B0205.1	WBGene00015017
B0205.11	WBGene00015025
B0205.12	WBGene00044413
B0205.3	WBGene00004466
B0205.6	WBGene00015021
B0205.7	WBGene00002191
B0205.8	WBGene00015022
B0205.9	WBGene00015023
B0207.4	WBGene00000099
B0207.6	WBGene00015029
B0212.3	WBGene00015037
B0228.7	WBGene00015064
B0238.10	WBGene00015074
B0238.11	WBGene00015075
B0238.9	WBGene00015073
B0240.4	WBGene00007118
B0244.8	WBGene00015083
B0250.1	WBGene00004413
B0250.5	WBGene00007122
B0250.8	WBGene00007125
B0252.4	WBGene00000886
B0261.1	WBGene00015091
B0261.2	WBGene00002583
B0261.4	WBGene00015092
B0261.7	WBGene00015095
B0261.8	WBGene00015096
B0272.3	WBGene00007129
B0273.2	WBGene00004243
B0273.3	WBGene00015098
B0273.4	WBGene00006745
B0280.1	WBGene00015099
B0280.10	WBGene00015105
B0280.3	WBGene00015101
B0280.5	WBGene00015102
B0280.8	WBGene00003609
B0280.9	WBGene00015104
B0285.1	WBGene00007135
B0285.3	WBGene00007136
B0285.4	WBGene00007137
B0285.5	WBGene00002003
B0285.8	WBGene00000511
B0286.4	WBGene00003825
B0302.1	WBGene00002207
B0303.15	WBGene00015133
B0303.3	WBGene00015125
B0303.4	WBGene00015126
B0303.7	WBGene00015128
B0303.9	WBGene00015130
B0304.2	WBGene00015134
B0304.4	WBGene00015136
B0334.11	WBGene00003868
B0334.15	WBGene00195248
B0334.2	WBGene00006660
B0334.3	WBGene00007143
B0334.4	WBGene00007144
B0334.5	WBGene00007145
B0334.8	WBGene00000090
B0336.1	WBGene00006943
B0336.10	WBGene00004435
B0336.13	WBGene00015150
B0336.2	WBGene00000182
B0336.3	WBGene00015143
B0336.4	WBGene00004348
B0336.5	WBGene00015145
B0336.6	WBGene00015146
B0336.7	WBGene00015147
B0336.8	WBGene00002982
B0336.9	WBGene00006359
B0348.4	WBGene00001177
B0348.6	WBGene00002061
B0350.2	WBGene00006780
B0361.10	WBGene00015164
B0361.2	WBGene00015156
B0361.3	WBGene00015157
B0361.5	WBGene00015159
B0361.6	WBGene00015160
B0361.7	WBGene00015161
B0361.8	WBGene00015162
B0365.1	WBGene00007150
B0365.3	WBGene00001137
B0379.3	WBGene00003508
B0379.4	WBGene00007054
B0393.1	WBGene00004469
B0393.2	WBGene00007167
B0393.3	WBGene00007168
B0393.6	WBGene00007171
B0393.8	WBGene00007173
B0393.9	WBGene00044636
B0403.4	WBGene00015168
B0412.3	WBGene00015173
B0412.4	WBGene00004498
B0414.3	WBGene00001856
B0414.5	WBGene00000772
B0414.6	WBGene00001600
B0414.7	WBGene00003472
B0414.8	WBGene00015176
B0416.5	WBGene00015181
B0416.6	WBGene00001638
B0432.10	WBGene00015191
B0432.13	WBGene00015194
B0432.2	WBGene00015184
B0432.3	WBGene00015185
B0432.4	WBGene00015186
B0432.8	WBGene00015189
B0454.1	WBGene00002997
B0457.1	WBGene00002251
B0464.1	WBGene00001094
B0464.2	WBGene00007184
B0464.3	WBGene00007185
B0464.4	WBGene00000268
B0464.5	WBGene00004980
B0464.6	WBGene00007186
B0464.7	WBGene00000235
B0464.8	WBGene00007187
B0464.9	WBGene00007188
B0491.1	WBGene00007189
B0491.5	WBGene00007192
B0491.6	WBGene00007193
B0491.7	WBGene00007194
B0495.2	WBGene00015203
B0495.5	WBGene00015204
B0495.6	WBGene00015205
B0495.7	WBGene00015206
B0495.8	WBGene00015207
B0495.9	WBGene00015208
B0507.2	WBGene00015219
B0511.10	WBGene00001228
B0511.11	WBGene00015236
B0511.12	WBGene00015237
B0511.13	WBGene00015238
B0511.2	WBGene00015228
B0511.6	WBGene00015232
B0511.7	WBGene00015233
B0511.8	WBGene00044321
B0511.9	WBGene00015235
B0513.2	WBGene00007195
B0513.3	WBGene00004443
B0513.5	WBGene00007197
B0523.3	WBGene00003993
B0523.5	WBGene00001443
B0546.1	WBGene00015248
B0546.2	WBGene00015249
B0546.4	WBGene00015251
B0547.1	WBGene00000817
B0563.4	WBGene00006479
B0564.1	WBGene00007201
B0564.11	WBGene00023421
B0564.2	WBGene00007202
B0564.7	WBGene00007207
BE0003N10.1	WBGene00015266
BE0003N10.2	WBGene00015267
BE0003N10.3	WBGene00015268
C01A2.3	WBGene00007215
C01A2.4	WBGene00007216
C01A2.5	WBGene00007217
C01B10.8	WBGene00015282
C01B10.9	WBGene00015283
C01B12.2	WBGene00015285
C01B12.8	WBGene00015291
C01B7.6	WBGene00004457
C01C7.1	WBGene00000186
C01F1.1	WBGene00015296
C01F1.2	WBGene00015297
C01F1.6	WBGene00015301
C01F6.1	WBGene00007221
C01F6.14	WBGene00219207
C01F6.4	WBGene00001413
C01F6.6	WBGene00006438
C01F6.8	WBGene00002046
C01F6.9	WBGene00007223
C01G10.10	WBGene00007237
C01G10.11	WBGene00006808
C01G10.12	WBGene00001021
C01G10.7	WBGene00007234
C01G10.8	WBGene00007235
C01G12.3	WBGene00007244
C01G5.2	WBGene00004179
C01G5.5	WBGene00015307
C01G5.6	WBGene00015308
C01G5.8	WBGene00015310
C01G6.4	WBGene00007226
C01G6.5	WBGene00007227
C01G6.6	WBGene00006510
C01G8.1	WBGene00015312
C01G8.2	WBGene00000540
C01G8.3	WBGene00000965
C01G8.4	WBGene00001022
C01G8.5	WBGene00001333
C01G8.6	WBGene00015313
C01H6.5	WBGene00003622
C01H6.7	WBGene00007256
C01H6.9	WBGene00007258
C02B10.1	WBGene00015326
C02B10.2	WBGene00015327
C02B10.3	WBGene00015328
C02B10.4	WBGene00015329
C02B10.5	WBGene00015330
C02C6.1	WBGene00001130
C02D5.4	WBGene00043097
C02E11.1	WBGene00015344
C02F4.1	WBGene00000419
C02F5.1	WBGene00002231
C02F5.10	WBGene00015351
C02F5.13	WBGene00015353
C02F5.3	WBGene00015346
C02F5.4	WBGene00015347
C02F5.6	WBGene00015349
C02F5.7	WBGene00015350
C02F5.9	WBGene00003952
C03A3.2	WBGene00007267
C03B1.12	WBGene00003053
C03B8.2	WBGene00015385
C03B8.4	WBGene00003002
C03C10.1	WBGene00002202
C03C10.3	WBGene00004392
C03C10.4	WBGene00007270
C03C11.2	WBGene00001483
C03D6.3	WBGene00000466
C03D6.4	WBGene00003800
C03D6.5	WBGene00007277
C03D6.6	WBGene00007278
C03D6.8	WBGene00004437
C03E10.4	WBGene00001645
C03G5.1	WBGene00015391
C03H12.1	WBGene00007284
C03H5.2	WBGene00015404
C03H5.3	WBGene00015405
C04A11.4	WBGene00000074
C04A2.3	WBGene00001194
C04A2.7	WBGene00001023
C04C3.3	WBGene00015413
C04C3.5	WBGene00001119
C04D8.1	WBGene00015418
C04E6.11	WBGene00015425
C04F12.10	WBGene00001405
C04F12.4	WBGene00004426
C04F12.5	WBGene00007299
C04F5.1	WBGene00004795
C04F5.8	WBGene00015450
C04F5.9	WBGene00015451
C04G2.6	WBGene00001001
C04G6.3	WBGene00004040
C04G6.4	WBGene00015454
C04H5.6	WBGene00003392
C05C10.2	WBGene00007329
C05C10.3	WBGene00007330
C05C10.5	WBGene00007332
C05C10.6	WBGene00007333
C05C10.7	WBGene00007334
C05C8.1	WBGene00015460
C05C8.2	WBGene00015461
C05C8.4	WBGene00001563
C05C8.5	WBGene00015462
C05C8.6	WBGene00015463
C05C8.9	WBGene00015466
C05D11.1	WBGene00015481
C05D11.10	WBGene00015487
C05D11.11	WBGene00003214
C05D11.12	WBGene00002855
C05D11.13	WBGene00015488
C05D11.2	WBGene00006516
C05D11.3	WBGene00006515
C05D11.7	WBGene00015484
C05D11.8	WBGene00015485
C05D11.9	WBGene00015486
C05D2.1	WBGene00000900
C05D2.10	WBGene00015470
C05D2.5	WBGene00001514
C05D2.6	WBGene00015468
C05D2.8	WBGene00015469
C05D9.1	WBGene00004927
C05E11.1	WBGene00015492
C05G5.2	WBGene00007348
C05G5.3	WBGene00007349
C06A1.1	WBGene00007352
C06A1.5	WBGene00007355
C06A5.1	WBGene00015499
C06A5.11	WBGene00004803
C06A5.12	WBGene00044414
C06A5.3	WBGene00015501
C06A5.4	WBGene00015502
C06A5.5	WBGene00015503
C06A5.6	WBGene00015504
C06A5.7	WBGene00006823
C06A5.8	WBGene00015505
C06A5.9	WBGene00004380
C06A6.3	WBGene00015508
C06A6.4	WBGene00015509
C06A8.1	WBGene00015512
C06A8.2	WBGene00015513
C06A8.4	WBGene00004823
C06A8.5	WBGene00015515
C06B3.4	WBGene00007363
C06B3.6	WBGene00007365
C06B8.8	WBGene00004452
C06C3.1	WBGene00003196
C06E1.1	WBGene00015518
C06E1.10	WBGene00015525
C06E1.9	WBGene00015524
C06E7.1	WBGene00015538
C06E7.3	WBGene00015540
C06E8.3	WBGene00004182
C06G1.4	WBGene00015547
C06G3.10	WBGene00000585
C06G3.11	WBGene00006572
C06G3.2	WBGene00002228
C06G3.5	WBGene00015551
C06G3.6	WBGene00015552
C06G3.7	WBGene00015553
C06G3.8	WBGene00015554
C06G3.9	WBGene00015555
C06G4.1	WBGene00015557
C06G4.2	WBGene00000542
C06H2.1	WBGene00007385
C06H2.2	WBGene00007386
C06H2.3	WBGene00007387
C06H2.6	WBGene00007390
C07A12.4	WBGene00003963
C07A9.2	WBGene00007400
C07A9.3	WBGene00006579
C07A9.7	WBGene00007403
C07D10.2	WBGene00015567
C07D8.6	WBGene00015565
C07E3.1	WBGene00007412
C07E3.2	WBGene00007413
C07F11.1	WBGene00006593
C07G1.3	WBGene00003961
C07G1.4	WBGene00006957
C07G1.5	WBGene00004101
C07G1.8	WBGene00044608
C07G2.1	WBGene00000465
C07G2.2	WBGene00000223
C07G2.3	WBGene00000380
C07G3.9	WBGene00015577
C07H4.1	WBGene00007421
C07H4.2	WBGene00000532
C07H6.1	WBGene00002986
C07H6.2	WBGene00015579
C07H6.4	WBGene00015581
C07H6.5	WBGene00000479
C07H6.6	WBGene00000537
C07H6.8	WBGene00000854
C08B11.1	WBGene00006996
C08B11.2	WBGene00001835
C08B11.3	WBGene00007433
C08B11.5	WBGene00004723
C08B11.6	WBGene00007434
C08B11.7	WBGene00006724
C08B11.8	WBGene00007435
C08B11.9	WBGene00007436
C08B6.7	WBGene00007428
C08B6.8	WBGene00007429
C08B6.9	WBGene00000142
C08C3.2	WBGene00015590
C08C3.4	WBGene00015591
C08F8.1	WBGene00007443
C08F8.2	WBGene00007444
C08F8.3	WBGene00007445
C08F8.9	WBGene00007449
C08H9.16	WBGene00086566
C08H9.2	WBGene00007463
C08H9.3	WBGene00007464
C09B8.6	WBGene00002023
C09B8.7	WBGene00003911
C09D4.4	WBGene00015635
C09D4.5	WBGene00004431
C09D8.1	WBGene00004215
C09E7.4	WBGene00015638
C09E7.7	WBGene00015641
C09E7.8	WBGene00015642
C09E7.9	WBGene00015643
C09E8.1	WBGene00015644
C09E9.1	WBGene00007476
C09F5.2	WBGene00015648
C09F9.3	WBGene00007480
C09G12.8	WBGene00000424
C09G4.1	WBGene00002043
C09G4.2	WBGene00015650
C09G4.3	WBGene00001051
C09G4.4	WBGene00044001
C09G5.2	WBGene00007488
C09G9.1	WBGene00007492
C09G9.2	WBGene00007493
C09G9.6	WBGene00003864
C09H10.10	WBGene00007504
C09H10.2	WBGene00004454
C09H10.3	WBGene00003831
C09H10.6	WBGene00007500
C09H6.1	WBGene00005009
C09H6.2	WBGene00002999
C09H6.3	WBGene00003136
C10B5.1	WBGene00015670
C10C5.6	WBGene00000911
C10C6.1	WBGene00002192
C10C6.5	WBGene00007513
C10C6.6	WBGene00007514
C10E2.6	WBGene00015676
C10F3.1	WBGene00015677
C10G11.5	WBGene00004068
C10G11.7	WBGene00015687
C10G6.1	WBGene00015680
C10G8.8	WBGene00015684
C10H11.1	WBGene00015691
C10H11.10	WBGene00015698
C10H11.4	WBGene00015693
C10H11.9	WBGene00002694
C11D2.4	WBGene00015702
C11D2.7	WBGene00015703
C12D8.1	WBGene00007534
C12D8.10	WBGene00000102
C12D8.11	WBGene00004405
C13B4.1	WBGene00007545
C13B4.2	WBGene00006856
C13B9.2	WBGene00015733
C13B9.3	WBGene00015734
C13C4.4	WBGene00007548
C13F10.2	WBGene00015742
C13F10.4	WBGene00015743
C13F10.5	WBGene00015744
C13F10.6	WBGene00015745
C13F10.7	WBGene00015746
C13G3.3	WBGene00007554
C13G5.2	WBGene00015747
C14A11.3	WBGene00006496
C14A4.1	WBGene00007555
C14A4.10	WBGene00006397
C14A4.11	WBGene00007561
C14A4.14	WBGene00007564
C14A4.2	WBGene00000933
C14A4.3	WBGene00007556
C14A4.4	WBGene00000796
C14A4.5	WBGene00000798
C14B1.1	WBGene00003962
C14B1.10	WBGene00007581
C14B1.12	WBGene00184990
C14B1.2	WBGene00007573
C14B1.3	WBGene00007574
C14B1.4	WBGene00006474
C14B1.5	WBGene00007576
C14B1.6	WBGene00007577
C14B1.7	WBGene00007578
C14B1.8	WBGene00007579
C14B1.9	WBGene00007580
C14B9.10	WBGene00015755
C14B9.2	WBGene00015752
C14B9.4	WBGene00004042
C14B9.6	WBGene00001565
C14B9.7	WBGene00004433
C14B9.8	WBGene00015754
C14C10.2	WBGene00007585
C14C10.3	WBGene00007586
C14C10.4	WBGene00007587
C14C10.5	WBGene00007588
C14C11.2	WBGene00015766
C14C11.3	WBGene00015767
C14C11.6	WBGene00003507
C14C11.7	WBGene00015769
C15C6.3	WBGene00007602
C15C6.4	WBGene00007603
C15C8.4	WBGene00007606
C15C8.7	WBGene00007609
C15F1.3	WBGene00006605
C15F1.4	WBGene00004090
C15F1.5	WBGene00015796
C15F1.6	WBGene00000198
C15F1.7	WBGene00004930
C15F1.8	WBGene00015797
C15H11.4	WBGene00000985
C15H11.5	WBGene00007615
C15H11.6	WBGene00003835
C15H11.7	WBGene00003922
C15H11.8	WBGene00007616
C15H11.9	WBGene00007617
C15H9.6	WBGene00002007
C16A11.10	WBGene00185089
C16A11.2	WBGene00015815
C16A11.3	WBGene00015816
C16A11.4	WBGene00015817
C16A11.5	WBGene00015818
C16A11.6	WBGene00015819
C16A11.9	WBGene00045297
C16A3.1	WBGene00015806
C16A3.10	WBGene00015814
C16A3.2	WBGene00015807
C16A3.3	WBGene00002850
C16A3.4	WBGene00015809
C16A3.5	WBGene00015810
C16A3.6	WBGene00015811
C16A3.7	WBGene00007048
C16A3.8	WBGene00015813
C16A3.9	WBGene00004482
C16C10.1	WBGene00007622
C16C10.10	WBGene00006448
C16C10.11	WBGene00007630
C16C10.2	WBGene00007623
C16C10.3	WBGene00007624
C16C10.4	WBGene00007625
C16C10.5	WBGene00007626
C16C10.6	WBGene00007627
C16C10.7	WBGene00004381
C16C10.8	WBGene00007628
C16C2.3	WBGene00007620
C16C2.4	WBGene00007621
C16C4.18	WBGene00194998
C16C8.11	WBGene00015849
C16C8.12	WBGene00015850
C16C8.13	WBGene00015851
C16C8.14	WBGene00015852
C16C8.16	WBGene00015853
C16C8.4	WBGene00015842
C16C8.5	WBGene00015843
C16H3.3	WBGene00015868
C17C3.1	WBGene00015887
C17D12.7	WBGene00007640
C17E4.10	WBGene00007647
C17E4.11	WBGene00044236
C17E4.3	WBGene00007643
C17E4.4	WBGene00007644
C17E4.5	WBGene00003904
C17E4.6	WBGene00007645
C17E4.9	WBGene00007646
C17G1.5	WBGene00007652
C17G10.1	WBGene00015915
C17G10.2	WBGene00015916
C17G10.4	WBGene00000383
C17G10.8	WBGene00000970
C17G10.9	WBGene00015920
C17H11.4	WBGene00015924
C17H11.6	WBGene00015926
C17H12.1	WBGene00015927
C17H12.11	WBGene00015936
C17H12.13	WBGene00015938
C17H12.14	WBGene00006917
C17H12.2	WBGene00015928
C18A11.7	WBGene00001000
C18A3.1	WBGene00015939
C18A3.2	WBGene00015940
C18A3.3	WBGene00015941
C18A3.4	WBGene00015942
C18A3.5	WBGene00015943
C18B2.4	WBGene00015955
C18C4.10	WBGene00002215
C18C4.5	WBGene00015966
C18D1.1	WBGene00000995
C18D11.4	WBGene00004705
C18E3.2	WBGene00015971
C18E3.5	WBGene00015974
C18E3.6	WBGene00015975
C18E3.7	WBGene00004093
C18E3.8	WBGene00001985
C18E3.9	WBGene00015976
C18E9.10	WBGene00007690
C18E9.11	WBGene00003870
C18E9.2	WBGene00007683
C18E9.3	WBGene00004105
C18E9.4	WBGene00007684
C18E9.6	WBGene00007686
C18F10.7	WBGene00015978
C18F3.2	WBGene00004732
C18G1.4	WBGene00003994
C18G1.5	WBGene00001855
C18H2.2	WBGene00015989
C18H9.3	WBGene00016002
C23G10.2	WBGene00016011
C23G10.3	WBGene00004472
C23G10.4	WBGene00004459
C23G10.7	WBGene00016014
C23G10.8	WBGene00016015
C23H3.1	WBGene00001193
C23H3.3	WBGene00016019
C23H3.4	WBGene00016020
C23H3.5	WBGene00016021
C24A11.8	WBGene00001491
C24A11.9	WBGene00000761
C24B5.2	WBGene00016045
C24B9.3	WBGene00016048
C24D10.4	WBGene00016055
C24D10.6	WBGene00016057
C24F3.1	WBGene00007696
C24F3.2	WBGene00007697
C24F3.4	WBGene00007698
C24G6.1	WBGene00006376
C24G6.3	WBGene00016060
C24G6.8	WBGene00016062
C24H10.5	WBGene00006861
C24H11.5	WBGene00007702
C24H11.6	WBGene00007021
C24H11.7	WBGene00007703
C24H12.4	WBGene00016073
C24H12.5	WBGene00016074
C25A1.1	WBGene00007705
C25A1.10	WBGene00000931
C25A1.12	WBGene00007711
C25A1.13	WBGene00007712
C25A1.16	WBGene00077526
C25A1.3	WBGene00006447
C25A1.4	WBGene00007706
C25A1.5	WBGene00007707
C25A1.7	WBGene00002153
C25A1.8	WBGene00007709
C25A1.9	WBGene00007710
C25A11.4	WBGene00000100
C25D7.10	WBGene00007720
C25D7.6	WBGene00003155
C25D7.7	WBGene00004308
C25D7.8	WBGene00007718
C25E10.8	WBGene00016097
C25F6.1	WBGene00016102
C25G4.2	WBGene00007730
C25G4.3	WBGene00007731
C25G4.4	WBGene00007732
C25G4.5	WBGene00001085
C25H3.12	WBGene00016121
C25H3.14	WBGene00016123
C25H3.17	WBGene00194642
C25H3.3	WBGene00016112
C25H3.4	WBGene00016113
C25H3.6	WBGene00016115
C25H3.7	WBGene00016116
C25H3.8	WBGene00016117
C25H3.9	WBGene00016118
C26B2.1	WBGene00016124
C26B2.6	WBGene00016128
C26B2.7	WBGene00016129
C26C6.1	WBGene00007042
C26C6.2	WBGene00001648
C26C6.5	WBGene00000938
C26D10.1	WBGene00004304
C26D10.2	WBGene00001840
C26E6.11	WBGene00016144
C26E6.12	WBGene00016145
C26E6.2	WBGene00016138
C26E6.4	WBGene00016140
C26E6.5	WBGene00001499
C26E6.6	WBGene00016142
C26E6.7	WBGene00016143
C26E6.8	WBGene00006735
C26E6.9	WBGene00004782
C26F1.3	WBGene00016148
C26F1.4	WBGene00004499
C26F1.7	WBGene00016150
C26F1.9	WBGene00004453
C26H9A.1	WBGene00006916
C26H9A.2	WBGene00007752
C27A12.10	WBGene00023409
C27A12.2	WBGene00016154
C27A12.3	WBGene00006492
C27A12.6	WBGene00016156
C27A12.7	WBGene00016157
C27A12.8	WBGene00016158
C27A12.9	WBGene00016159
C27A2.1	WBGene00016151
C27A2.2	WBGene00004434
C27A2.3	WBGene00002068
C27A2.6	WBGene00001102
C27A7.5	WBGene00007756
C27A7.6	WBGene00007757
C27B7.1	WBGene00005007
C27B7.2	WBGene00007760
C27B7.4	WBGene00007761
C27B7.5	WBGene00007762
C27B7.8	WBGene00004307
C27C7.1	WBGene00007766
C27D11.1	WBGene00001209
C27D6.4	WBGene00016162
C27D8.4	WBGene00007780
C27D9.1	WBGene00016163
C27F2.10	WBGene00016171
C27F2.4	WBGene00016166
C27F2.5	WBGene00016167
C27F2.7	WBGene00016169
C27F2.8	WBGene00016170
C27F2.9	WBGene00043156
C27H2.2	WBGene00007782
C27H5.2	WBGene00016172
C27H5.3	WBGene00016173
C27H6.2	WBGene00007784
C27H6.3	WBGene00007785
C27H6.4	WBGene00007786
C27H6.8	WBGene00007787
C27H6.9	WBGene00077500
C28A5.1	WBGene00007788
C28A5.2	WBGene00007789
C28A5.6	WBGene00007791
C28C12.10	WBGene00006450
C28C12.12	WBGene00016182
C28C12.2	WBGene00016178
C28C12.9	WBGene00001566
C28D4.2	WBGene00000509
C28D4.3	WBGene00001607
C28H8.1	WBGene00016192
C28H8.12	WBGene00001018
C28H8.3	WBGene00016194
C28H8.4	WBGene00016195
C28H8.6	WBGene00016197
C28H8.9	WBGene00016200
C29A12.1	WBGene00007797
C29A12.3	WBGene00002985
C29E4.12	WBGene00016209
C29E4.13	WBGene00043051
C29E4.2	WBGene00016202
C29E4.3	WBGene00004303
C29E4.4	WBGene00003801
C29E4.5	WBGene00016203
C29E4.8	WBGene00002879
C29F7.3	WBGene00007812
C29F9.7	WBGene00003931
C29H12.1	WBGene00004680
C29H12.2	WBGene00016235
C29H12.5	WBGene00016236
C30A5.2	WBGene00004342
C30A5.3	WBGene00016238
C30B5.1	WBGene00016243
C30B5.2	WBGene00016244
C30B5.4	WBGene00016245
C30C11.1	WBGene00016249
C30C11.2	WBGene00004460
C30C11.4	WBGene00016250
C30F12.2	WBGene00016261
C30F12.4	WBGene00016263
C30F8.2	WBGene00016258
C30F8.4	WBGene00002213
C30G12.6	WBGene00016277
C30G12.7	WBGene00004244
C30G7.1	WBGene00001852
C30H6.7	WBGene00007824
C30H6.8	WBGene00007825
C30H6.9	WBGene00007826
C30H7.2	WBGene00016278
C31H1.6	WBGene00016289
C31H1.8	WBGene00016291
C31H5.4	WBGene00007855
C32A3.1	WBGene00004765
C32A3.3	WBGene00007860
C32D5.10	WBGene00016317
C32D5.11	WBGene00016318
C32D5.3	WBGene00016311
C32D5.5	WBGene00016313
C32D5.8	WBGene00016316
C32D5.9	WBGene00002980
C32E8.11	WBGene00016326
C32E8.2	WBGene00004425
C32E8.3	WBGene00016321
C32E8.5	WBGene00016323
C32E8.8	WBGene00004217
C32E8.9	WBGene00016325
C32F10.1	WBGene00016331
C32F10.2	WBGene00003020
C32F10.5	WBGene00001973
C32F10.8	WBGene00016333
C33A11.2	WBGene00007878
C33A12.1	WBGene00007880
C33A12.3	WBGene00007882
C33B4.4	WBGene00007892
C33C12.10	WBGene00016342
C33C12.9	WBGene00016341
C33D3.1	WBGene00001250
C33D9.13	WBGene00194651
C33D9.6	WBGene00007900
C33F10.14	WBGene00050941
C33F10.2	WBGene00016352
C33F10.4	WBGene00016353
C33H5.10	WBGene00044326
C33H5.11	WBGene00016378
C33H5.12	WBGene00004703
C33H5.14	WBGene00016380
C33H5.15	WBGene00016381
C33H5.17	WBGene00016383
C33H5.18	WBGene00016384
C33H5.19	WBGene00044325
C33H5.4	WBGene00002221
C33H5.6	WBGene00016373
C33H5.7	WBGene00016374
C33H5.8	WBGene00016375
C33H5.9	WBGene00016376
C34B2.10	WBGene00016395
C34B2.2	WBGene00016387
C34B2.5	WBGene00016390
C34B2.6	WBGene00016391
C34B2.7	WBGene00016392
C34B2.8	WBGene00016393
C34B7.2	WBGene00007912
C34B7.4	WBGene00007914
C34C12.2	WBGene00007921
C34C12.3	WBGene00007922
C34C12.4	WBGene00007923
C34C12.8	WBGene00007927
C34C6.4	WBGene00007917
C34C6.5	WBGene00007918
C34D4.10	WBGene00016402
C34D4.12	WBGene00000888
C34D4.13	WBGene00016404
C34D4.14	WBGene00016405
C34D4.4	WBGene00016400
C34E10.1	WBGene00001662
C34E10.10	WBGene00016411
C34E10.11	WBGene00016412
C34E10.2	WBGene00001661
C34E10.3	WBGene00001660
C34E10.4	WBGene00006946
C34E10.5	WBGene00016408
C34E10.6	WBGene00000229
C34E10.8	WBGene00016409
C34E11.1	WBGene00004682
C34F11.3	WBGene00016415
C34F11.9	WBGene00001101
C34F6.4	WBGene00002029
C34G6.5	WBGene00016421
C34G6.6	WBGene00016422
C34G6.7	WBGene00004109
C34H4.5	WBGene00016427
C35A5.8	WBGene00007952
C35B1.2	WBGene00016432
C35B1.5	WBGene00016435
C35B8.2	WBGene00006887
C35C5.3	WBGene00007955
C35D10.1	WBGene00016439
C35D10.10	WBGene00016446
C35D10.13	WBGene00016449
C35D10.16	WBGene00000204
C35D10.17	WBGene00016452
C35D10.4	WBGene00000767
C35D10.5	WBGene00016442
C35D10.6	WBGene00016443
C35D10.7	WBGene00016444
C35D10.8	WBGene00016445
C35D10.9	WBGene00000418
C35E7.8	WBGene00016460
C35E7.9	WBGene00016461
C36A4.4	WBGene00007965
C36A4.8	WBGene00000264
C36A4.9	WBGene00007969
C36B1.1	WBGene00000527
C36B1.11	WBGene00007978
C36B1.12	WBGene00007979
C36B1.14	WBGene00044614
C36B1.3	WBGene00007971
C36B1.4	WBGene00003925
C36B1.5	WBGene00007972
C36B1.7	WBGene00007974
C36B1.8	WBGene00007975
C36E6.1	WBGene00016489
C36E8.1	WBGene00007980
C36E8.3	WBGene00007982
C36E8.5	WBGene00006537
C36F7.2	WBGene00007985
C37A2.2	WBGene00004110
C37A2.4	WBGene00000871
C37A2.5	WBGene00004111
C37A2.6	WBGene00016492
C37A2.7	WBGene00016493
C37A2.8	WBGene00016494
C37A5.7	WBGene00007991
C37C3.1	WBGene00016495
C37C3.2	WBGene00016496
C37C3.6	WBGene00003242
C37C3.8	WBGene00016500
C37C3.9	WBGene00016501
C37E2.1	WBGene00007993
C37H5.13	WBGene00016511
C37H5.3	WBGene00016507
C37H5.5	WBGene00016508
C37H5.6	WBGene00016509
C37H5.8	WBGene00002010
C38C10.2	WBGene00008000
C38C10.4	WBGene00001689
C38C10.5	WBGene00004343
C38C3.5	WBGene00006794
C38C6.2	WBGene00000225
C38D4.1	WBGene00008003
C38D4.3	WBGene00003210
C38D4.4	WBGene00008005
C38D4.5	WBGene00008006
C38D4.6	WBGene00003912
C38D4.9	WBGene00008008
C39B5.6	WBGene00016524
C39E9.11	WBGene00008034
C39E9.12	WBGene00008035
C39E9.13	WBGene00004339
C39E9.14	WBGene00001007
C39F7.4	WBGene00004266
C40H1.1	WBGene00000770
C40H1.6	WBGene00008041
C41C4.4	WBGene00002147
C41C4.6	WBGene00006739
C41C4.7	WBGene00008052
C41C4.8	WBGene00008053
C41D11.1	WBGene00016561
C41D11.2	WBGene00001231
C41D11.3	WBGene00016562
C41D11.5	WBGene00016564
C41D11.7	WBGene00016566
C41D11.8	WBGene00000787
C41D11.9	WBGene00016567
C41G7.1	WBGene00004887
C41G7.2	WBGene00002226
C41G7.3	WBGene00008061
C41G7.4	WBGene00008062
C41G7.7	WBGene00008064
C41G7.9	WBGene00077771
C41H7.3	WBGene00016573
C41H7.4	WBGene00016574
C41H7.5	WBGene00016575
C41H7.6	WBGene00016576
C41H7.9	WBGene00044370
C42C1.10	WBGene00016588
C42C1.11	WBGene00016589
C42C1.12	WBGene00016590
C42C1.13	WBGene00016591
C42C1.14	WBGene00004448
C42C1.15	WBGene00016592
C42C1.4	WBGene00016582
C42C1.5	WBGene00016583
C42C1.8	WBGene00016586
C42C1.9	WBGene00016587
C42D4.8	WBGene00004411
C42D8.8	WBGene00000149
C43E11.1	WBGene00016601
C43E11.10	WBGene00000382
C43E11.11	WBGene00016608
C43E11.12	WBGene00016609
C43E11.2	WBGene00016602
C43E11.3	WBGene00016603
C43E11.4	WBGene00007001
C43E11.6	WBGene00003516
C43E11.7	WBGene00003584
C43E11.8	WBGene00016606
C43E11.9	WBGene00016607
C43G2.1	WBGene00016610
C43G2.2	WBGene00016611
C43H6.1	WBGene00016614
C43H8.1	WBGene00016621
C43H8.2	WBGene00016622
C44B12.1	WBGene00016636
C44B12.5	WBGene00016638
C44B7.1	WBGene00016623
C44B7.10	WBGene00016630
C44B7.12	WBGene00016632
C44B7.2	WBGene00016624
C44B9.3	WBGene00008080
C44B9.4	WBGene00008081
C44B9.5	WBGene00008082
C44C1.2	WBGene00016642
C44C11.1	WBGene00004310
C44E4.1	WBGene00016650
C44E4.3	WBGene00016652
C44E4.4	WBGene00016653
C44E4.5	WBGene00016654
C44E4.6	WBGene00016655
C45B11.1	WBGene00006443
C45B2.6	WBGene00016661
C45E5.6	WBGene00003636
C45G3.1	WBGene00008107
C45G3.3	WBGene00001590
C45G3.5	WBGene00044008
C45G9.2	WBGene00016674
C45G9.5	WBGene00016676
C46A5.5	WBGene00016701
C46A5.6	WBGene00016702
C46A5.9	WBGene00001827
C46C2.1	WBGene00006941
C46C2.2	WBGene00008110
C46C2.7	WBGene00045078
C46E10.4	WBGene00016710
C46F11.2	WBGene00008117
C46F11.3	WBGene00008118
C46F11.4	WBGene00008119
C46F11.5	WBGene00008120
C46F11.6	WBGene00008121
C46F4.1	WBGene00001175
C46H11.11	WBGene00016735
C47A4.1	WBGene00008122
C47B2.2	WBGene00008131
C47B2.3	WBGene00006529
C47B2.4	WBGene00003948
C47B2.5	WBGene00001234
C47B2.6	WBGene00008132
C47B2.7	WBGene00008133
C47B2.9	WBGene00008134
C47C12.4	WBGene00016737
C47D12.1	WBGene00007028
C47D12.2	WBGene00008136
C47D12.5	WBGene00008139
C47D12.6	WBGene00006617
C47D12.8	WBGene00008140
C47E12.1	WBGene00005663
C47E12.2	WBGene00008147
C47E12.3	WBGene00008148
C47E12.4	WBGene00008149
C47E12.5	WBGene00006699
C47E12.6	WBGene00008150
C47E12.7	WBGene00008151
C47E8.4	WBGene00008143
C47E8.5	WBGene00000915
C47E8.7	WBGene00006836
C47E8.8	WBGene00008145
C47G2.3	WBGene00008164
C47G2.4	WBGene00008165
C47G2.5	WBGene00008166
C48B4.10	WBGene00008173
C48B4.11	WBGene00008174
C48B4.4	WBGene00000421
C48B4.6	WBGene00008169
C48B4.7	WBGene00008170
C48B4.8	WBGene00008171
C48B4.9	WBGene00008172
C48B6.10	WBGene00016746
C48B6.2	WBGene00016740
C48B6.3	WBGene00016741
C48B6.6	WBGene00004879
C48E7.1	WBGene00016749
C48E7.11	WBGene00016754
C48E7.2	WBGene00016750
C48E7.3	WBGene00003059
C48G7.3	WBGene00008183
C49A9.10	WBGene00016764
C49A9.9	WBGene00016763
C49C3.15	WBGene00008204
C49C3.6	WBGene00008196
C49C3.7	WBGene00008197
C49C8.3	WBGene00016767
C49F5.1	WBGene00008205
C49G7.10	WBGene00016788
C49H3.10	WBGene00002080
C49H3.11	WBGene00004471
C49H3.3	WBGene00016790
C49H3.4	WBGene00016791
C49H3.6	WBGene00016792
C49H3.8	WBGene00016793
C49H3.9	WBGene00016794
C50B6.2	WBGene00008218
C50B6.3	WBGene00008219
C50B8.1	WBGene00008224
C50B8.2	WBGene00000250
C50B8.3	WBGene00008225
C50C3.1	WBGene00016799
C50C3.6	WBGene00004187
C50C3.8	WBGene00016803
C50D2.5	WBGene00016808
C50D2.7	WBGene00016810
C50D2.9	WBGene00016812
C50E10.4	WBGene00004945
C50E3.5	WBGene00016816
C50F2.2	WBGene00016836
C50F2.3	WBGene00016837
C50F4.11	WBGene00003160
C50F4.12	WBGene00008236
C50F4.13	WBGene00001909
C50F4.14	WBGene00008237
C50F4.16	WBGene00008238
C50F4.4	WBGene00008232
C50F4.5	WBGene00001915
C50F4.6	WBGene00001910
C50F4.7	WBGene00001911
C50F7.4	WBGene00016844
C50F7.6	WBGene00016846
C51F7.1	WBGene00001493
C52B9.4	WBGene00016867
C52E12.1	WBGene00016888
C52E12.3	WBGene00005025
C52E12.4	WBGene00016889
C52E4.2	WBGene00003235
C52E4.3	WBGene00004917
C52E4.4	WBGene00004501
C52E4.6	WBGene00000876
C53A3.2	WBGene00016892
C53A5.1	WBGene00008262
C53A5.16	WBGene00194706
C53A5.17	WBGene00194707
C53A5.2	WBGene00008263
C53A5.3	WBGene00001834
C53B4.4	WBGene00008274
C53B4.6	WBGene00008275
C53B7.2	WBGene00016893
C53B7.4	WBGene00000210
C53D5.1	WBGene00016902
C53D5.4	WBGene00016905
C53D5.6	WBGene00002077
C53D6.4	WBGene00008281
C53H9.1	WBGene00004441
C53H9.2	WBGene00016907
C53H9.3	WBGene00044746
C54C6.1	WBGene00004451
C54C6.2	WBGene00000248
C54C6.6	WBGene00008288
C54D1.3	WBGene00002163
C54G10.2	WBGene00004337
C54G10.3	WBGene00004060
C54G4.1	WBGene00008311
C54G4.6	WBGene00008316
C54G4.7	WBGene00008317
C54G4.8	WBGene00000869
C54G4.9	WBGene00008318
C54G6.1	WBGene00016930
C54H2.5	WBGene00004788
C55A6.1	WBGene00008330
C55A6.10	WBGene00008339
C55A6.2	WBGene00008331
C55A6.9	WBGene00008338
C55B6.1	WBGene00016939
C55B6.2	WBGene00001025
C55B7.1	WBGene00001599
C55B7.11	WBGene00016947
C55B7.5	WBGene00016944
C55B7.8	WBGene00000937
C55B7.9	WBGene00007018
C55C3.5	WBGene00016955
C56A3.4	WBGene00008343
C56A3.5	WBGene00008344
C56A3.6	WBGene00008345
C56A3.8	WBGene00008346
C56C10.1	WBGene00016960
C56C10.10	WBGene00016966
C56C10.11	WBGene00016967
C56C10.13	WBGene00001026
C56C10.3	WBGene00016961
C56C10.7	WBGene00016964
C56C10.8	WBGene00002045
C56C10.9	WBGene00016965
C56E6.2	WBGene00016970
C56E6.3	WBGene00016971
C56E6.9	WBGene00195085
C56G2.1	WBGene00016977
C56G2.15	WBGene00016983
C56G2.5	WBGene00016980
C56G2.6	WBGene00002891
C56G2.7	WBGene00016981
C56G7.1	WBGene00003372
C56G7.3	WBGene00008348
CC4.3	WBGene00004895
CD4.2	WBGene00000795
CD4.3	WBGene00016989
CD4.4	WBGene00016990
CD4.6	WBGene00003927
CD4.7	WBGene00016992
CD4.8	WBGene00016993
D1007.10	WBGene00017007
D1007.12	WBGene00004436
D1007.16	WBGene00017011
D1007.4	WBGene00017002
D1007.5	WBGene00017003
D1007.6	WBGene00004479
D1007.7	WBGene00017004
D1007.8	WBGene00017005
D1009.2	WBGene00000884
D1014.3	WBGene00017016
D1014.4	WBGene00017017
D1014.8	WBGene00005006
D1022.1	WBGene00006703
D1022.7	WBGene00000101
D1037.1	WBGene00017025
D1037.4	WBGene00004272
D1043.1	WBGene00008361
D1044.6	WBGene00017031
D1046.1	WBGene00008362
D1046.2	WBGene00008363
D1046.3	WBGene00008364
D1046.7	WBGene00077749
D1053.1	WBGene00001790
D1054.1	WBGene00008370
D1054.13	WBGene00008379
D1054.14	WBGene00008380
D1054.15	WBGene00006481
D1054.2	WBGene00003923
D1054.3	WBGene00008371
D1069.3	WBGene00017037
D1081.6	WBGene00008384
D1081.7	WBGene00008385
D1081.8	WBGene00008386
D1081.9	WBGene00008387
D1086.4	WBGene00001864
D2005.1	WBGene00008397
D2005.3	WBGene00008398
D2005.4	WBGene00008399
D2005.5	WBGene00008400
D2005.7	WBGene00086551
D2007.4	WBGene00017044
D2007.5	WBGene00017045
D2013.1	WBGene00004286
D2013.10	WBGene00006520
D2013.2	WBGene00008402
D2013.5	WBGene00001134
D2013.6	WBGene00008404
D2013.7	WBGene00001229
D2013.8	WBGene00004744
D2013.9	WBGene00008405
D2023.2	WBGene00004258
D2023.4	WBGene00008408
D2023.5	WBGene00008409
D2023.6	WBGene00008410
D2024.5	WBGene00017053
D2024.6	WBGene00000292
D2030.1	WBGene00008411
D2030.11	WBGene00008420
D2030.2	WBGene00008412
D2030.3	WBGene00008413
D2030.4	WBGene00008414
D2030.5	WBGene00008415
D2030.6	WBGene00004178
D2030.7	WBGene00008417
D2030.8	WBGene00008418
D2030.9	WBGene00008419
D2045.1	WBGene00000231
D2045.2	WBGene00008422
D2045.6	WBGene00000836
D2063.3	WBGene00017062
D2085.1	WBGene00004259
D2085.3	WBGene00008428
D2085.4	WBGene00008429
D2085.5	WBGene00008430
D2085.6	WBGene00008431
D2089.1	WBGene00004704
D2089.3	WBGene00008434
D2089.4	WBGene00004207
D2092.2	WBGene00017064
D2092.5	WBGene00017066
D2096.1	WBGene00017069
D2096.10	WBGene00017077
D2096.11	WBGene00017078
D2096.12	WBGene00017079
D2096.2	WBGene00017070
D2096.4	WBGene00005019
D2096.7	WBGene00017074
D2096.8	WBGene00017075
DC2.3	WBGene00017080
DC2.8	WBGene00077643
DY3.1	WBGene00006574
DY3.2	WBGene00003052
DY3.4	WBGene00006618
DY3.7	WBGene00006324
DY3.8	WBGene00008440
E01A2.1	WBGene00017084
E01A2.2	WBGene00017085
E01A2.4	WBGene00017086
E01A2.5	WBGene00017087
E01A2.6	WBGene00017088
E01B7.1	WBGene00008441
E01B7.2	WBGene00008442
E01F3.1	WBGene00008443
E01G4.3	WBGene00008446
E01G4.4	WBGene00004116
E02A10.1	WBGene00008452
E02D9.1	WBGene00017098
E02H1.1	WBGene00008455
E02H1.2	WBGene00008456
E02H1.3	WBGene00006473
E02H1.4	WBGene00004050
E02H1.5	WBGene00008457
E02H1.6	WBGene00008458
E02H1.7	WBGene00003618
E02H1.8	WBGene00008459
E02H9.3	WBGene00017101
E03A3.2	WBGene00004322
E04A4.4	WBGene00001983
E04A4.5	WBGene00017119
E04A4.7	WBGene00017121
E04A4.8	WBGene00004432
E04D5.1	WBGene00008480
E04F6.11	WBGene00000530
E04F6.4	WBGene00017124
E04F6.5	WBGene00017125
E04F6.8	WBGene00017127
E04F6.9	WBGene00017128
EEED8.1	WBGene00017132
EEED8.10	WBGene00017138
EEED8.13	WBGene00017141
EEED8.14	WBGene00017142
EEED8.16	WBGene00017144
EEED8.3	WBGene00017134
EEED8.5	WBGene00003393
EEED8.7	WBGene00004701
EEED8.8	WBGene00003583
EEED8.9	WBGene00017137
E_BE45912.2	WBGene00017153
F01D4.5	WBGene00008488
F01F1.1	WBGene00017158
F01F1.10	WBGene00017164
F01F1.11	WBGene00017165
F01F1.12	WBGene00017166
F01F1.15	WBGene00017169
F01F1.2	WBGene00017159
F01F1.4	WBGene00017161
F01F1.5	WBGene00001057
F01F1.6	WBGene00000115
F01F1.7	WBGene00017162
F01F1.8	WBGene00000381
F01F1.9	WBGene00017163
F01G10.1	WBGene00008506
F01G12.2	WBGene00006353
F01G4.1	WBGene00004204
F01G4.2	WBGene00000181
F01G4.3	WBGene00008502
F01G4.4	WBGene00008503
F01G4.5	WBGene00008504
F01G4.6	WBGene00008505
F02A9.2	WBGene00001385
F02A9.3	WBGene00001386
F02A9.4	WBGene00008514
F02A9.6	WBGene00001609
F02E11.3	WBGene00017181
F02E8.1	WBGene00000207
F02E8.3	WBGene00000157
F02E8.6	WBGene00003561
F02E9.1	WBGene00008528
F02E9.10	WBGene00008533
F02E9.2	WBGene00003014
F02E9.4	WBGene00004117
F02E9.5	WBGene00008530
F02E9.7	WBGene00008531
F02E9.9	WBGene00008532
F07A11.2	WBGene00008546
F07A11.3	WBGene00003791
F07A11.6	WBGene00008549
F07A5.1	WBGene00002136
F07B7.2	WBGene00017186
F07C3.4	WBGene00017195
F07C3.7	WBGene00000003
F07C6.4	WBGene00008555
F07D10.1	WBGene00004423
F07E5.5	WBGene00017210
F07F6.7	WBGene00017219
F07F6.8	WBGene00017220
F07H5.10	WBGene00008561
F08A8.7	WBGene00008569
F08B1.1	WBGene00006923
F08B4.1	WBGene00000994
F08B4.3	WBGene00017235
F08B4.5	WBGene00017237
F08B4.6	WBGene00002028
F08B4.7	WBGene00017238
F08B6.1	WBGene00017239
F08B6.2	WBGene00001682
F08B6.3	WBGene00017240
F08C6.4	WBGene00006063
F08C6.6	WBGene00017244
F08D12.1	WBGene00017245
F08F1.7	WBGene00006472
F08F1.8	WBGene00006649
F08F3.2	WBGene00017261
F08F3.9	WBGene00017265
F08F8.10	WBGene00017275
F08F8.2	WBGene00017268
F08F8.4	WBGene00017269
F08F8.7	WBGene00017272
F08F8.8	WBGene00017273
F08F8.9	WBGene00017274
F08G12.1	WBGene00008585
F08G2.4	WBGene00008576
F08G5.1	WBGene00008580
F08H9.1	WBGene00000592
F09A5.4	WBGene00008601
F09B9.3	WBGene00001331
F09C8.2	WBGene00008622
F09D1.1	WBGene00017280
F09E5.1	WBGene00004034
F09E5.11	WBGene00017289
F09E5.13	WBGene00000094
F09E5.15	WBGene00006434
F09E5.17	WBGene00017293
F09E5.2	WBGene00017282
F09E5.3	WBGene00017283
F09E5.5	WBGene00017284
F09E5.7	WBGene00017285
F09E5.8	WBGene00017286
F09E8.2	WBGene00008624
F09E8.3	WBGene00003421
F09F7.3	WBGene00017300
F09F7.4	WBGene00017301
F09F7.6	WBGene00017303
F09F7.7	WBGene00017304
F09G2.2	WBGene00017311
F09G2.4	WBGene00017313
F09G2.8	WBGene00017316
F09G2.9	WBGene00017317
F09G8.2	WBGene00007056
F09G8.3	WBGene00017319
F10B5.1	WBGene00004421
F10B5.2	WBGene00008639
F10B5.5	WBGene00008641
F10B5.6	WBGene00001281
F10B5.7	WBGene00004510
F10B5.8	WBGene00008642
F10C2.2	WBGene00002241
F10C2.4	WBGene00008645
F10C2.5	WBGene00008646
F10C2.6	WBGene00001095
F10C5.1	WBGene00003134
F10C5.2	WBGene00017328
F10D11.1	WBGene00004931
F10D11.2	WBGene00008648
F10D7.2	WBGene00017339
F10E7.11	WBGene00017352
F10E7.2	WBGene00017344
F10E7.5	WBGene00017347
F10E7.6	WBGene00017348
F10E7.7	WBGene00004447
F10E7.8	WBGene00017349
F10E9.11	WBGene00017360
F10E9.3	WBGene00017355
F10E9.4	WBGene00017356
F10E9.5	WBGene00017357
F10E9.6	WBGene00003243
F10E9.7	WBGene00017358
F10E9.8	WBGene00004726
F10F2.1	WBGene00004760
F10G7.1	WBGene00006497
F10G7.10	WBGene00017373
F10G7.11	WBGene00017374
F10G7.2	WBGene00006626
F10G7.3	WBGene00006817
F10G7.4	WBGene00004737
F10G7.5	WBGene00017369
F10G7.8	WBGene00004461
F10G7.9	WBGene00017372
F10G8.3	WBGene00003803
F10G8.5	WBGene00003564
F10G8.6	WBGene00008664
F10G8.7	WBGene00008665
F10G8.9	WBGene00008667
F11A10.1	WBGene00008682
F11A10.2	WBGene00008683
F11A10.3	WBGene00008684
F11A10.4	WBGene00008685
F11A10.5	WBGene00008686
F11A10.6	WBGene00008687
F11A10.7	WBGene00008688
F11A10.8	WBGene00044329
F11A3.2	WBGene00008670
F11E6.7	WBGene00008710
F11G11.2	WBGene00001755
F11G11.5	WBGene00017385
F11G11.7	WBGene00001027
F11H8.1	WBGene00004341
F11H8.4	WBGene00000872
F12A10.8	WBGene00017397
F12F6.1	WBGene00008720
F12F6.3	WBGene00004360
F12F6.5	WBGene00006406
F12F6.6	WBGene00004755
F12F6.7	WBGene00008722
F13A2.4	WBGene00017413
F13A7.14	WBGene00045357
F13B10.2	WBGene00004414
F13B12.1	WBGene00008729
F13B12.6	WBGene00008733
F13B9.1	WBGene00017419
F13C5.2	WBGene00017423
F13D12.2	WBGene00002262
F13D12.4	WBGene00000114
F13D12.5	WBGene00008740
F13D12.6	WBGene00008741
F13D12.7	WBGene00001679
F13E6.1	WBGene00008745
F13E6.4	WBGene00008748
F13E6.5	WBGene00008749
F13E9.1	WBGene00008750
F13G11.1	WBGene00007058
F13G3.10	WBGene00008768
F13G3.11	WBGene00008769
F13G3.4	WBGene00008764
F13G3.5	WBGene00008765
F13G3.6	WBGene00008766
F13G3.7	WBGene00008767
F13G3.9	WBGene00003236
F13H10.2	WBGene00003586
F13H10.3	WBGene00008774
F13H10.4	WBGene00008775
F13H10.8	WBGene00044784
F13H8.10	WBGene00000259
F13H8.2	WBGene00017435
F14B4.2	WBGene00008780
F14B4.3	WBGene00008781
F14B8.2	WBGene00017445
F14D12.2	WBGene00006826
F14D2.1	WBGene00017450
F14D2.11	WBGene00017459
F14D2.12	WBGene00017460
F14D2.13	WBGene00017461
F14D2.14	WBGene00017462
F14D2.15	WBGene00023427
F14D2.4	WBGene00017452
F14D2.8	WBGene00017456
F14E5.2	WBGene00008800
F14H8.1	WBGene00008832
F15A4.11	WBGene00044323
F15A4.12	WBGene00044322
F15A4.9	WBGene00008843
F15B10.1	WBGene00017480
F15B10.2	WBGene00001090
F15B10.3	WBGene00017481
F15B9.10	WBGene00045418
F15B9.4	WBGene00008848
F15C11.2	WBGene00008852
F15D3.1	WBGene00001131
F15D3.6	WBGene00008856
F15D3.7	WBGene00008857
F15D4.1	WBGene00000274
F15D4.2	WBGene00008859
F15D4.3	WBGene00008860
F15D4.5	WBGene00008862
F15E6.1	WBGene00017482
F15H10.3	WBGene00000144
F16A11.1	WBGene00008876
F16A11.2	WBGene00008877
F16A11.3	WBGene00008878
F16B12.4	WBGene00008880
F16D3.2	WBGene00004684
F16D3.4	WBGene00008887
F17A9.2	WBGene00017534
F17C11.10	WBGene00008921
F17C11.7	WBGene00008918
F17C11.8	WBGene00008919
F17C11.9	WBGene00008920
F18A1.2	WBGene00003012
F18A1.3	WBGene00003044
F18A1.4	WBGene00003045
F18A1.5	WBGene00017546
F18A1.6	WBGene00017547
F18A1.7	WBGene00017548
F18A1.8	WBGene00017549
F18A11.1	WBGene00004242
F18A11.3	WBGene00008930
F18C12.2	WBGene00004378
F18C12.3	WBGene00008934
F18C5.10	WBGene00017563
F18C5.2	WBGene00006944
F18C5.3	WBGene00007050
F18E2.2	WBGene00006512
F18E2.3	WBGene00004738
F18E3.7	WBGene00017565
F18G5.6	WBGene00017582
F18H3.3	WBGene00003903
F19B10.1	WBGene00017583
F19B10.10	WBGene00017589
F19B6.1	WBGene00008948
F19B6.2	WBGene00006733
F19F10.10	WBGene00017606
F19F10.11	WBGene00017607
F19F10.12	WBGene00017608
F19F10.9	WBGene00017605
F20A1.9	WBGene00017620
F20B6.2	WBGene00006921
F20B6.3	WBGene00003412
F20C5.1	WBGene00004051
F20C5.6	WBGene00008971
F20D1.1	WBGene00008973
F20D1.3	WBGene00008975
F20D1.4	WBGene00008976
F20D12.1	WBGene00017641
F20D12.2	WBGene00017642
F20D12.4	WBGene00017643
F20D12.5	WBGene00017644
F20D6.4	WBGene00005648
F20G2.2	WBGene00008986
F20G4.1	WBGene00008990
F20G4.2	WBGene00008991
F20G4.3	WBGene00003777
F20H11.1	WBGene00017646
F20H11.2	WBGene00002889
F20H11.3	WBGene00003162
F20H11.5	WBGene00017648
F21A10.2	WBGene00008999
F21A3.5	WBGene00008995
F21C3.1	WBGene00006656
F21C3.3	WBGene00009002
F21C3.4	WBGene00004324
F21C3.5	WBGene00009004
F21D5.1	WBGene00009006
F21D5.2	WBGene00009007
F21D5.5	WBGene00009010
F21D5.6	WBGene00009011
F21D5.7	WBGene00009012
F21D5.8	WBGene00009013
F21F3.4	WBGene00017674
F21F3.6	WBGene00017675
F21F3.7	WBGene00017676
F21H11.2	WBGene00004728
F21H11.3	WBGene00006543
F21H12.1	WBGene00017683
F21H12.5	WBGene00001402
F21H12.6	WBGene00017686
F22B3.1	WBGene00001938
F22B3.2	WBGene00001937
F22B3.4	WBGene00009035
F22B5.1	WBGene00001358
F22B5.10	WBGene00009045
F22B5.2	WBGene00001230
F22B5.7	WBGene00006994
F22B5.9	WBGene00001498
F22B7.13	WBGene00001688
F22B7.5	WBGene00001028
F22B7.6	WBGene00017696
F22B8.7	WBGene00009049
F22D3.1	WBGene00000459
F22D3.2	WBGene00017699
F22D3.5	WBGene00017701
F22D6.2	WBGene00009050
F22D6.3	WBGene00003815
F22D6.4	WBGene00009051
F22D6.5	WBGene00004186
F22D6.6	WBGene00009052
F22D6.8	WBGene00043279
F22D6.9	WBGene00009054
F22E5.9	WBGene00017708
F22F7.1	WBGene00017719
F22F7.5	WBGene00000514
F22F7.7	WBGene00017724
F22G12.4	WBGene00009064
F22G12.5	WBGene00009065
F22H10.6	WBGene00017730
F23A7.4	WBGene00009069
F23A7.8	WBGene00044638
F23B12.5	WBGene00009082
F23B12.6	WBGene00006465
F23B12.7	WBGene00009084
F23B12.8	WBGene00000257
F23B2.13	WBGene00009078
F23B2.6	WBGene00000121
F23C8.4	WBGene00017733
F23C8.5	WBGene00017734
F23C8.6	WBGene00017735
F23C8.8	WBGene00017737
F23C8.9	WBGene00017738
F23D12.10	WBGene00045291
F23F1.1	WBGene00017742
F23F1.10	WBGene00017750
F23F1.5	WBGene00017746
F23F1.8	WBGene00004504
F23F1.9	WBGene00017749
F23F12.6	WBGene00004503
F23H11.1	WBGene00017757
F23H11.2	WBGene00017758
F23H11.3	WBGene00017759
F23H11.4	WBGene00017760
F23H11.5	WBGene00000263
F23H11.9	WBGene00017763
F23H12.2	WBGene00009092
F25B3.1	WBGene00009098
F25B3.6	WBGene00009103
F25B4.1	WBGene00017765
F25B4.4	WBGene00017767
F25B4.5	WBGene00017768
F25B4.6	WBGene00017769
F25B4.7	WBGene00017770
F25B5.2	WBGene00017774
F25B5.3	WBGene00017775
F25B5.4	WBGene00006727
F25B5.5	WBGene00017776
F25B5.6	WBGene00017777
F25B5.7	WBGene00017778
F25D1.1	WBGene00006460
F25D7.1	WBGene00000843
F25D7.2	WBGene00009112
F25D7.4	WBGene00009113
F25F2.2	WBGene00000396
F25G6.2	WBGene00017797
F25G6.8	WBGene00017799
F25G6.9	WBGene00017800
F25H2.1	WBGene00006578
F25H2.10	WBGene00004408
F25H2.11	WBGene00009122
F25H2.12	WBGene00009123
F25H2.13	WBGene00009124
F25H2.4	WBGene00009118
F25H2.5	WBGene00009119
F25H2.6	WBGene00009120
F25H2.7	WBGene00009121
F25H2.8	WBGene00006720
F25H2.9	WBGene00003926
F25H5.3	WBGene00009126
F25H5.4	WBGene00001167
F25H5.5	WBGene00009127
F25H5.6	WBGene00009128
F25H8.1	WBGene00009131
F25H8.2	WBGene00009132
F25H9.5	WBGene00001496
F25H9.6	WBGene00009138
F25H9.7	WBGene00009139
F26A1.1	WBGene00017801
F26A3.1	WBGene00009140
F26A3.2	WBGene00009141
F26A3.3	WBGene00001214
F26A3.4	WBGene00009142
F26A3.7	WBGene00009145
F26A3.8	WBGene00004508
F26B1.2	WBGene00017816
F26B1.3	WBGene00002073
F26D10.10	WBGene00001606
F26D10.3	WBGene00002005
F26D10.9	WBGene00000224
F26D11.1	WBGene00017818
F26D11.11	WBGene00002632
F26D12.1	WBGene00001439
F26D2.2	WBGene00006375
F26E4.1	WBGene00006352
F26E4.10	WBGene00009163
F26E4.11	WBGene00009164
F26E4.12	WBGene00009165
F26E4.4	WBGene00009159
F26E4.6	WBGene00009161
F26E4.8	WBGene00006528
F26E4.9	WBGene00000371
F26F12.7	WBGene00002637
F26F2.7	WBGene00009172
F26F4.1	WBGene00017825
F26F4.10	WBGene00004679
F26F4.11	WBGene00017830
F26F4.12	WBGene00017831
F26F4.13	WBGene00017832
F26F4.3	WBGene00004400
F26F4.4	WBGene00017826
F26F4.5	WBGene00017827
F26F4.6	WBGene00017828
F26F4.7	WBGene00003598
F26F4.8	WBGene00005011
F26F4.9	WBGene00017829
F26G1.1	WBGene00017837
F26G5.9	WBGene00006523
F26H11.1	WBGene00009179
F26H11.2	WBGene00009180
F26H11.4	WBGene00009182
F26H11.5	WBGene00001371
F26H11.6	WBGene00194892
F26H9.1	WBGene00009173
F26H9.2	WBGene00009174
F26H9.4	WBGene00009176
F26H9.5	WBGene00009177
F26H9.6	WBGene00004268
F26H9.7	WBGene00006732
F27B3.5	WBGene00017847
F27C1.2	WBGene00017852
F27C1.6	WBGene00017855
F27C1.7	WBGene00000230
F27C8.6	WBGene00009186
F27D4.1	WBGene00009187
F27D4.2	WBGene00009188
F27D4.4	WBGene00009189
F27D4.5	WBGene00006518
F27D4.7	WBGene00009191
F27D4.8	WBGene00077543
F27D9.1	WBGene00006757
F27D9.5	WBGene00017864
F28A10.6	WBGene00017874
F28B12.3	WBGene00017895
F28B3.1	WBGene00017882
F28B3.10	WBGene00017889
F28B3.5	WBGene00017886
F28B3.6	WBGene00017887
F28B3.7	WBGene00001860
F28B3.8	WBGene00002075
F28B3.9	WBGene00017888
F28B4.2	WBGene00017891
F28C1.1	WBGene00009200
F28C10.3	WBGene00017898
F28C6.10	WBGene00009209
F28C6.2	WBGene00009203
F28C6.3	WBGene00000773
F28C6.4	WBGene00009204
F28C6.6	WBGene00006307
F28C6.7	WBGene00004440
F28C6.8	WBGene00009207
F28D1.1	WBGene00009211
F28D1.10	WBGene00001580
F28D1.11	WBGene00009219
F28D1.7	WBGene00004492
F28D1.8	WBGene00009217
F28D1.9	WBGene00009218
F28D9.1	WBGene00004706
F28D9.4	WBGene00009220
F28F8.3	WBGene00003079
F28F8.4	WBGene00009222
F28F8.5	WBGene00009223
F28F8.6	WBGene00006446
F28F8.9	WBGene00044188
F28H1.3	WBGene00000197
F28H6.6	WBGene00009234
F29A7.6	WBGene00017916
F29B9.1	WBGene00017919
F29B9.10	WBGene00017924
F29B9.11	WBGene00017925
F29B9.2	WBGene00017920
F29B9.4	WBGene00004205
F29B9.6	WBGene00006706
F29B9.8	WBGene00017923
F29C12.3	WBGene00009245
F29C12.4	WBGene00009246
F29C4.1	WBGene00000897
F29C4.2	WBGene00017926
F29C4.6	WBGene00017928
F29C4.7	WBGene00017929
F29D10.4	WBGene00002035
F29D11.2	WBGene00009254
F29F11.1	WBGene00005022
F29F11.3	WBGene00009256
F29F11.6	WBGene00001747
F29G9.2	WBGene00017931
F29G9.3	WBGene00000159
F29G9.4	WBGene00001345
F29G9.5	WBGene00004502
F30A10.10	WBGene00009267
F30A10.3	WBGene00009262
F30A10.5	WBGene00006061
F30A10.6	WBGene00009264
F30A10.8	WBGene00006062
F30A10.9	WBGene00009266
F30F8.1	WBGene00009270
F30F8.3	WBGene00009272
F30F8.5	WBGene00009274
F30F8.8	WBGene00006386
F30F8.9	WBGene00009276
F31C3.1	WBGene00000881
F31C3.2	WBGene00009284
F31C3.3	WBGene00009285
F31C3.4	WBGene00009286
F31C3.5	WBGene00009287
F31D4.1	WBGene00009289
F31D4.2	WBGene00009290
F31D4.3	WBGene00001431
F31D4.9	WBGene00009294
F31E3.3	WBGene00004340
F31E3.4	WBGene00017951
F31E3.5	WBGene00001168
F31E3.6	WBGene00017952
F32A11.1	WBGene00009307
F32A11.2	WBGene00001998
F32A5.1	WBGene00017967
F32A5.7	WBGene00003078
F32A6.4	WBGene00000092
F32A7.4	WBGene00009305
F32B4.4	WBGene00009314
F32B5.1	WBGene00017975
F32B5.6	WBGene00017979
F32B6.2	WBGene00009319
F32B6.3	WBGene00009320
F32B6.8	WBGene00009322
F32D1.1	WBGene00017981
F32D1.10	WBGene00003159
F32D1.2	WBGene00017982
F32D1.5	WBGene00017984
F32D1.6	WBGene00017985
F32D1.7	WBGene00017986
F32D1.9	WBGene00017988
F32D8.13	WBGene00009335
F32D8.14	WBGene00009336
F32D8.4	WBGene00009329
F32D8.5	WBGene00009330
F32D8.6	WBGene00001303
F32E10.1	WBGene00017989
F32E10.2	WBGene00017990
F32E10.4	WBGene00002074
F32E10.5	WBGene00017992
F32E10.6	WBGene00017993
F32E10.9	WBGene00043068
F32H2.1	WBGene00001568
F32H2.10	WBGene00009346
F32H2.2	WBGene00007026
F32H2.3	WBGene00004953
F32H2.4	WBGene00009341
F32H2.5	WBGene00009342
F33A8.1	WBGene00002957
F33A8.3	WBGene00000472
F33A8.4	WBGene00009352
F33A8.5	WBGene00009353
F33C8.1	WBGene00006432
F33C8.3	WBGene00006634
F33D11.10	WBGene00018007
F33D11.11	WBGene00018008
F33D11.12	WBGene00018009
F33D11.9	WBGene00018006
F33D4.2	WBGene00002173
F33D4.4	WBGene00017996
F33D4.5	WBGene00017997
F33D4.7	WBGene00017999
F33D4.8	WBGene00023487
F33E11.2	WBGene00018010
F33E11.3	WBGene00018011
F33E11.6	WBGene00018013
F33E2.2	WBGene00001008
F33G12.2	WBGene00018014
F33G12.3	WBGene00018015
F33G12.4	WBGene00018016
F33G12.5	WBGene00018017
F33G12.7	WBGene00044666
F33H1.2	WBGene00001686
F33H1.3	WBGene00009364
F33H1.4	WBGene00009365
F33H2.1	WBGene00001049
F33H2.2	WBGene00009366
F33H2.3	WBGene00009367
F33H2.5	WBGene00009368
F33H2.6	WBGene00009369
F33H2.7	WBGene00009370
F34D10.2	WBGene00009372
F34D10.4	WBGene00009374
F35B12.5	WBGene00009385
F35B3.5	WBGene00004121
F35C11.5	WBGene00009404
F35C8.4	WBGene00006371
F35C8.6	WBGene00003990
F35D11.3	WBGene00018044
F35D11.4	WBGene00018045
F35D11.5	WBGene00018046
F35D6.1	WBGene00001411
F35E12.10	WBGene00009434
F35F11.1	WBGene00018064
F35G12.1	WBGene00009439
F35G12.10	WBGene00000206
F35G12.11	WBGene00009444
F35G12.12	WBGene00009445
F35G12.2	WBGene00009440
F35G12.3	WBGene00004762
F35G12.4	WBGene00009441
F35G12.5	WBGene00009442
F35G12.7	WBGene00009443
F35G12.8	WBGene00004874
F35G12.9	WBGene00000145
F35G2.1	WBGene00009435
F35G2.2	WBGene00009436
F35H10.5	WBGene00018070
F35H10.6	WBGene00018071
F35H10.7	WBGene00018072
F35H12.4	WBGene00018076
F35H8.3	WBGene00009448
F36A2.1	WBGene00009451
F36A2.13	WBGene00009460
F36A2.2	WBGene00009452
F36A2.6	WBGene00004484
F36A2.7	WBGene00009454
F36A2.8	WBGene00009455
F36A2.9	WBGene00009456
F36A4.14	WBGene00003668
F36A4.7	WBGene00000123
F36D3.1	WBGene00009469
F36D4.2	WBGene00018088
F36D4.3	WBGene00002036
F36D4.5	WBGene00018090
F36F12.8	WBGene00018099
F36F2.3	WBGene00009477
F36F2.4	WBGene00009478
F36F2.6	WBGene00009479
F36G3.1	WBGene00009482
F36G3.2	WBGene00009483
F36H1.1	WBGene00001426
F36H1.2	WBGene00006490
F36H1.4	WBGene00002992
F36H1.6	WBGene00000109
F36H12.2	WBGene00018118
F36H2.1	WBGene00009498
F36H2.2	WBGene00009499
F36H9.3	WBGene00000976
F37A4.1	WBGene00018131
F37A4.2	WBGene00018132
F37A4.8	WBGene00002169
F37A4.9	WBGene00018137
F37B1.5	WBGene00001764
F37B12.2	WBGene00001527
F37B12.3	WBGene00009505
[truncated: 3,634 more rows]

## Sheet: Hermaphrodite specific
geneNames	wbgene
AC3.2	WBGene00007070
AC7.2	WBGene00004929
AH9.2	WBGene00000797
AH9.3	WBGene00014999
B0034.3	WBGene00000403
B0041.11	WBGene00206362
B0041.3	WBGene00015008
B0047.1	WBGene00015012
B0218.1	WBGene00015047
B0218.3	WBGene00004055
B0228.4	WBGene00015061
B0238.13	WBGene00015077
B0252.3	WBGene00015088
B0272.2	WBGene00007128
B0281.4	WBGene00015111
B0281.5	WBGene00015112
B0284.3	WBGene00007133
B0285.9	WBGene00000512
B0286.3	WBGene00015116
B0303.14	WBGene00015132
B0304.5	WBGene00005058
B0334.6	WBGene00007146
B0361.9	WBGene00015163
B0391.5	WBGene00007162
B0395.3	WBGene00007175
B0410.2	WBGene00015171
B0416.10	WBGene00206482
B0416.4	WBGene00015180
B0432.14	WBGene00044640
B0432.9	WBGene00015190
B0454.9	WBGene00015200
B0496.8	WBGene00015217
B0513.1	WBGene00001562
B0513.4	WBGene00007196
B0545.4	WBGene00015247
C01B4.6	WBGene00015270
C01B7.1	WBGene00015274
C01C10.1	WBGene00000523
C01F1.4	WBGene00015299
C01F6.5	WBGene00000120
C01G12.1	WBGene00007242
C01G6.1	WBGene00000170
C01G6.3	WBGene00007225
C01G6.8	WBGene00000289
C02B4.2	WBGene00003616
C02C6.3	WBGene00007261
C02F12.4	WBGene00006431
C02F12.8	WBGene00015357
C02F4.2	WBGene00006527
C02F5.12	WBGene00015352
C03B1.7	WBGene00015378
C03E10.6	WBGene00007283
C03F11.4	WBGene00015390
C03H5.5	WBGene00015407
C04A11.2	WBGene00007286
C04B4.2	WBGene00007290
C04C11.2	WBGene00007296
C04E6.7	WBGene00015423
C04E7.2	WBGene00015429
C04E7.5	WBGene00045270
C04F12.1	WBGene00007297
C04F12.9	WBGene00007303
C04F6.1	WBGene00006929
C04F6.3	WBGene00000503
C04F6.4	WBGene00006810
C04F6.5	WBGene00000990
C04G6.6	WBGene00015456
C05B5.3	WBGene00004100
C05B5.4	WBGene00007321
C05C12.6	WBGene00007338
C05D10.1	WBGene00015477
C05D10.4	WBGene00015480
C05D9.5	WBGene00002062
C05D9.7	WBGene00015474
C05G5.4	WBGene00007350
C05G6.1	WBGene00015497
C06A12.3	WBGene00007357
C06A6.2	WBGene00015507
C06A6.5	WBGene00015510
C06A8.3	WBGene00015514
C06E1.6	WBGene00015521
C06E2.5	WBGene00015529
C06E7.4	WBGene00015541
C06G1.5	WBGene00015548
C06H2.4	WBGene00007388
C06H2.7	WBGene00007391
C07A12.3	WBGene00003628
C07A12.5	WBGene00005008
C07A12.7	WBGene00015561
C07A9.9	WBGene00007405
C07D10.5	WBGene00015569
C07E3.6	WBGene00007417
C07E3.9	WBGene00007419
C07H6.7	WBGene00003024
C08A9.6	WBGene00015586
C08D8.2	WBGene00006582
C09B7.1	WBGene00004780
C09B7.2	WBGene00015621
C09B8.1	WBGene00002146
C09B8.4	WBGene00015623
C09B8.5	WBGene00015624
C09E8.3	WBGene00015646
C09F5.1	WBGene00015647
C10F3.5	WBGene00003954
C11E4.6	WBGene00007520
C11G6.1	WBGene00006384
C11H1.2	WBGene00007528
C11H1.3	WBGene00007529
C11H1.8	WBGene00007532
C11H1.9	WBGene00023500
C12D12.5	WBGene00015716
C13B9.4	WBGene00015735
C13C4.2	WBGene00007547
C13D9.7	WBGene00003573
C13G3.1	WBGene00007553
C14A11.9	WBGene00050944
C14B9.1	WBGene00002011
C14C10.6	WBGene00007589
C14F11.1	WBGene00015778
C14F11.2	WBGene00015779
C14F11.4	WBGene00015780
C14F5.1	WBGene00015776
C14F5.4	WBGene00015777
C14F5.5	WBGene00004774
C14H10.1	WBGene00007591
C14H10.2	WBGene00007592
C15B12.5	WBGene00001517
C15B12.7	WBGene00000393
C15C7.1	WBGene00015789
C15C7.2	WBGene00002220
C15C7.5	WBGene00015791
C15C7.7	WBGene00015793
C15C8.3	WBGene00007605
C15H11.3	WBGene00003834
C15H9.5	WBGene00015801
C15H9.9	WBGene00015803
C16B8.1	WBGene00003007
C16B8.4	WBGene00015824
C16C2.2	WBGene00001145
C16C4.4	WBGene00015828
C16C8.20	WBGene00195070
C16C8.21	WBGene00195071
C16D9.6	WBGene00015861
C16E9.2	WBGene00015866
C17B7.11	WBGene00015885
C17B7.2	WBGene00015876
C17C3.12	WBGene00015894
C17E4.20	WBGene00219313
C17E7.12	WBGene00015905
C17E7.4	WBGene00015899
C17E7.9	WBGene00015903
C17F4.5	WBGene00015912
C17G1.2	WBGene00007649
C17G1.4	WBGene00007651
C17G1.7	WBGene00007653
C17G1.8	WBGene00023491
C17H11.2	WBGene00015922
C18A11.5	WBGene00006962
C18A3.8	WBGene00001958
C18B12.4	WBGene00007666
C18B12.5	WBGene00007667
C18B12.6	WBGene00007668
C18B2.3	WBGene00015954
C18D11.3	WBGene00007681
C18D4.6	WBGene00007675
C18E3.3	WBGene00015972
C18F3.4	WBGene00044508
C23F12.4	WBGene00016009
C23H3.9	WBGene00016022
C23H4.1	WBGene00000277
C23H4.6	WBGene00007694
C23H5.8	WBGene00016027
C24A1.2	WBGene00016029
C24A1.3	WBGene00016030
C24A3.2	WBGene00016033
C24A8.4	WBGene00016038
C24D10.5	WBGene00016056
C24G6.4	WBGene00003637
C24H10.2	WBGene00016068
C24H12.2	WBGene00016072
C25A1.11	WBGene00000095
C25A11.2	WBGene00016087
C25A8.4	WBGene00016084
C25B8.4	WBGene00016088
C25D7.3	WBGene00004747
C25F6.2	WBGene00001006
C25G4.10	WBGene00007736
C25H3.11	WBGene00016120
C26B9.1	WBGene00016131
C27C12.1	WBGene00007771
C27C12.2	WBGene00007772
C27C12.3	WBGene00007773
C27C12.4	WBGene00007774
C27D8.3	WBGene00007779
C28C12.7	WBGene00004995
C28D4.1	WBGene00003690
C28D4.10	WBGene00007796
C28D4.9	WBGene00003728
C28G1.3	WBGene00016188
C29E4.1	WBGene00000665
C29E4.15	WBGene00045246
C29E4.7	WBGene00016204
C29F7.10	WBGene00206389
C29F7.4	WBGene00001435
C29F7.5	WBGene00001436
C29F9.1	WBGene00016216
C29G2.1	WBGene00016229
C30F12.1	WBGene00016260
C30F12.5	WBGene00016264
C30F2.1	WBGene00000760
C30G4.7	WBGene00016272
C30H6.6	WBGene00001811
C31C9.2	WBGene00007836
C31E10.5	WBGene00007846
C31E10.6	WBGene00007847
C31E10.7	WBGene00007848
C31G12.1	WBGene00007850
C31H2.14	WBGene00206484
C32B5.10	WBGene00016303
C32D5.7	WBGene00016315
C32E12.4	WBGene00016330
C32F10.6	WBGene00003601
C33A12.7	WBGene00007886
C33B4.3	WBGene00006444
C33E10.2	WBGene00016346
C33F10.5	WBGene00016354
C33G3.3	WBGene00007903
C33G3.6	WBGene00007906
C33G8.7	WBGene00016364
C33G8.8	WBGene00016365
C34B4.2	WBGene00007907
C34C12.5	WBGene00007924
C34D10.1	WBGene00016406
C34E11.3	WBGene00044079
C34F6.8	WBGene00007942
C34F6.9	WBGene00007943
C34H3.1	WBGene00016423
C35B8.3	WBGene00016438
C35C5.1	WBGene00004746
C35C5.4	WBGene00003239
C35E7.1	WBGene00016453
C35E7.5	WBGene00016457
C36A4.11	WBGene00044167
C36B7.6	WBGene00016469
C36C9.1	WBGene00016485
C36C9.3	WBGene00016486
C36E6.2	WBGene00016490
C36E6.3	WBGene00003369
C36E6.5	WBGene00003370
C36E8.4	WBGene00007983
C37H5.14	WBGene00045308
C37H5.2	WBGene00016506
C39B5.2	WBGene00016520
C39D10.7	WBGene00016534
C39E6.1	WBGene00003056
C39F7.2	WBGene00016539
C39F7.5	WBGene00016540
C41A3.2	WBGene00016559
C41D11.4	WBGene00016563
C41G11.4	WBGene00016570
C42D4.6	WBGene00004822
C42D8.2	WBGene00006926
C42D8.3	WBGene00006862
C43H6.3	WBGene00016616
C43H6.4	WBGene00016617
C44B12.2	WBGene00003893
C44B7.11	WBGene00016631
C44B7.5	WBGene00016627
C44B7.7	WBGene00016629
C44C1.1	WBGene00016641
C44C1.4	WBGene00016643
C44C10.4	WBGene00008085
C44C8.6	WBGene00007007
C44E4.2	WBGene00016651
C44E4.7	WBGene00016656
C44E4.8	WBGene00045479
C44H4.4	WBGene00008094
C44H4.5	WBGene00006524
C44H4.7	WBGene00001325
C45B2.5	WBGene00001602
C45G9.6	WBGene00016677
C45G9.7	WBGene00016678
C45H4.14	WBGene00016695
C46C11.1	WBGene00016704
C46F2.1	WBGene00016714
C46G7.2	WBGene00016722
C46G7.4	WBGene00004112
C46H11.2	WBGene00016728
C46H11.4	WBGene00002979
C46H3.2	WBGene00016725
C47D12.7	WBGene00002184
C47E12.8	WBGene00000964
C47F8.1	WBGene00008157
C48A7.1	WBGene00001187
C48B6.9	WBGene00016745
C48D5.1	WBGene00003605
C48D5.2	WBGene00004213
C48E7.10	WBGene00005000
C49A1.10	WBGene00008191
C49A1.4	WBGene00001377
C49C3.5	WBGene00008195
C49C3.8	WBGene00008198
C49F5.2	WBGene00008206
C49F5.3	WBGene00008207
C49F5.6	WBGene00008210
C50B6.9	WBGene00008222
C50C3.7	WBGene00086546
C50D2.6	WBGene00016809
C50E3.11	WBGene00016822
C50E3.12	WBGene00016823
C50E3.13	WBGene00016824
C50F2.6	WBGene00001430
C52B9.3	WBGene00016866
C52B9.8	WBGene00016868
C52D10.12	WBGene00016879
C52E2.6	WBGene00016885
C53B7.1	WBGene00004370
C53D6.6	WBGene00008283
C54E4.2	WBGene00016918
C54G7.2	WBGene00016934
C54H2.1	WBGene00006368
C54H2.3	WBGene00016937
C55B7.2	WBGene00001627
C55B7.4	WBGene00016943
CC8.2	WBGene00016987
D1005.1	WBGene00016995
D1007.15	WBGene00017010
D1022.4	WBGene00017023
D1025.1	WBGene00008353
D1044.1	WBGene00017027
D1044.2	WBGene00017028
D1054.10	WBGene00008377
D1054.11	WBGene00008378
D1069.2	WBGene00000778
D1069.4	WBGene00017038
D1081.2	WBGene00006844
D1086.19	WBGene00045406
D2007.1	WBGene00017041
D2013.3	WBGene00008403
D2021.1	WBGene00017046
D2021.2	WBGene00044071
D2024.3	WBGene00001241
D2089.5	WBGene00001522
D2092.4	WBGene00017065
DC2.7	WBGene00017083
DH11.2	WBGene00008436
DY3.6	WBGene00008439
E01G4.5	WBGene00008447
E01G6.2	WBGene00008450
E02A10.3	WBGene00008453
E02H4.3	WBGene00006517
E02H4.6	WBGene00008464
EEED8.15	WBGene00017143
EGAP2.1	WBGene00017147
F01E11.5	WBGene00017157
F01G10.8	WBGene00000910
F01G12.5	WBGene00002280
F02C12.1	WBGene00008515
F02D10.6	WBGene00008526
F02E8.4	WBGene00017177
F02E8.5	WBGene00017178
F02H6.1	WBGene00008534
F02H6.2	WBGene00008535
F02H6.3	WBGene00008536
F02H6.4	WBGene00008537
F02H6.5	WBGene00008538
F07A11.4	WBGene00008547
F07A5.7	WBGene00006754
F08B12.1	WBGene00008571
F08B6.4	WBGene00006819
F08C6.2	WBGene00017241
F08C6.3	WBGene00007059
F08C6.7	WBGene00006827
F08F1.5	WBGene00000422
F08F3.3	WBGene00004358
F08F3.6	WBGene00017263
F08G12.10	WBGene00002124
F08G12.2	WBGene00008586
F08G12.3	WBGene00008587
F08G12.4	WBGene00006922
F09B12.2	WBGene00008606
F09B9.2	WBGene00006839
F09E10.3	WBGene00000988
F09F7.2	WBGene00003371
F10A3.17	WBGene00045507
F10D7.5	WBGene00017342
F10G2.4	WBGene00017365
F10G8.8	WBGene00008666
F11A5.9	WBGene00008677
F11C1.1	WBGene00008690
F11C1.2	WBGene00008691
F11C1.5	WBGene00008694
F11C1.7	WBGene00045495
F11C3.3	WBGene00006789
F11E6.5	WBGene00001240
F12E12.1	WBGene00017402
F12E12.11	WBGene00044811
F13A7.10	WBGene00001792
F13B9.5	WBGene00002239
F13B9.8	WBGene00001425
F13C5.1	WBGene00017422
F13D2.1	WBGene00008735
F13E6.3	WBGene00008747
F13G3.1	WBGene00008762
F13H6.3	WBGene00017431
F14B8.1	WBGene00003732
F14D12.6	WBGene00006411
F14D2.5	WBGene00017453
F14D7.2	WBGene00008789
F14F11.1	WBGene00008819
F14F3.2	WBGene00008805
F14F3.3	WBGene00008806
F14F4.3	WBGene00003411
F14H12.4	WBGene00017472
F14H12.6	WBGene00017473
F14H12.7	WBGene00017474
F14H3.3	WBGene00008822
F14H3.4	WBGene00008823
F14H3.5	WBGene00008824
F14H3.6	WBGene00008825
F15A2.5	WBGene00001164
F15A4.10	WBGene00008844
F15A4.2	WBGene00008838
F16B12.6	WBGene00008882
F16B4.8	WBGene00000387
F16H11.3	WBGene00017532
F17A2.13	WBGene00008904
F17A2.5	WBGene00000461
F17A9.6	WBGene00017538
F17C11.11	WBGene00008922
F17C11.4	WBGene00008915
F17C8.1	WBGene00000068
F17E5.2	WBGene00008924
F17H10.1	WBGene00008925
F17H10.3	WBGene00008927
F18A11.5	WBGene00008932
F18E9.5	WBGene00017571
F18H3.1	WBGene00008939
F18H3.4	WBGene00008940
F18H3.5	WBGene00000406
F19B10.2	WBGene00017584
F19B10.9	WBGene00004750
F19B2.5	WBGene00008944
F19C6.1	WBGene00001708
F19C6.2	WBGene00008951
F19C7.3	WBGene00017593
F19H6.4	WBGene00008959
F20B6.9	WBGene00017632
F20C5.4	WBGene00008969
F20D1.10	WBGene00008980
F20D1.2	WBGene00008974
F20D1.6	WBGene00004317
F20D1.9	WBGene00008979
F20D6.10	WBGene00017639
F21C10.10	WBGene00017659
F21D12.1	WBGene00003620
F21D5.4	WBGene00009009
F21F8.3	WBGene00000218
F21G4.1	WBGene00009023
F21G4.2	WBGene00003410
F21G4.4	WBGene00009025
F21G4.6	WBGene00009027
F22B7.10	WBGene00001078
F22B8.6	WBGene00009048
F22E12.4	WBGene00001178
F22E5.17	WBGene00017712
F22F1.1	WBGene00001854
F22F1.2	WBGene00017714
F22F4.2	WBGene00002125
F23B12.9	WBGene00001170
F23D12.2	WBGene00009086
F23D12.7	WBGene00009091
F23H12.4	WBGene00005018
F25B4.2	WBGene00017766
F25E2.5	WBGene00000899
F25E5.1	WBGene00017782
F25H2.2	WBGene00009116
F25H8.6	WBGene00009133
F25H9.2	WBGene00009135
F25H9.4	WBGene00009137
F26A1.14	WBGene00017812
F26E4.7	WBGene00009162
F26F12.3	WBGene00017834
F26G5.1	WBGene00017843
F27C1.4	WBGene00017854
F27D9.6	WBGene00000992
F28D1.2	WBGene00009212
F28H1.1	WBGene00017908
F28H1.4	WBGene00017909
F28H6.4	WBGene00009233
F29G9.6	WBGene00000980
F29G9.7	WBGene00017933
F30A10.1	WBGene00009260
F30B5.4	WBGene00017934
F31B9.3	WBGene00009280
F31D4.8	WBGene00009293
F31D5.3	WBGene00006495
F31D5.6	WBGene00017949
F31E3.1	WBGene00000443
F31E8.4	WBGene00017954
F31E9.6	WBGene00009299
F31F6.2	WBGene00009301
F31F7.1	WBGene00017964
F32A6.3	WBGene00017974
F32A7.3	WBGene00009304
F32B5.8	WBGene00000788
F32B6.1	WBGene00003603
F32F2.1	WBGene00009337
F33E2.5	WBGene00009361
F33G12.6	WBGene00018018
F33H1.1	WBGene00000914
F34H10.3	WBGene00009380
F35A5.8	WBGene00001335
F35C5.2	WBGene00005040
F35C8.7	WBGene00018037
F35D2.3	WBGene00018041
F35E12.3	WBGene00009427
F35F10.11	WBGene00018060
F35F10.12	WBGene00018061
F35G2.3	WBGene00009437
F35G2.4	WBGene00004025
F35H10.10	WBGene00018073
F35H12.2	WBGene00018075
F35H12.3	WBGene00004769
F35H12.5	WBGene00018077
F35H8.6	WBGene00009450
F36D1.1	WBGene00009461
F36D1.9	WBGene00009468
F36F12.4	WBGene00018095
F36H9.4	WBGene00018112
F37B4.10	WBGene00018140
F37B4.7	WBGene00018138
F37H8.1	WBGene00003046
F38A5.7	WBGene00018164
F38A6.2	WBGene00001248
F38E11.3	WBGene00000775
F38H12.3	WBGene00018189
F39C12.1	WBGene00018193
F39C12.3	WBGene00006640
F39D8.3	WBGene00009561
F39E9.7	WBGene00018199
F39F10.2	WBGene00018202
F39F10.3	WBGene00018203
F39G3.2	WBGene00018207
F39H12.1	WBGene00018212
F39H12.3	WBGene00018214
F40B5.2	WBGene00018226
F40E10.3	WBGene00000822
F40F12.4	WBGene00009593
F40F4.3	WBGene00002253
F40F4.4	WBGene00002255
F40F4.6	WBGene00018237
F40F4.7	WBGene00018238
F40F8.5	WBGene00009578
F40G12.11	WBGene00009606
F40G9.4	WBGene00001963
F40H3.6	WBGene00018252
F40H6.4	WBGene00006547
F41B4.1	WBGene00018257
F41B4.3	WBGene00018259
F41B5.9	WBGene00018265
F41C3.5	WBGene00018271
F41D9.3	WBGene00006942
F41F3.2	WBGene00004928
F41G4.7	WBGene00018310
F41H10.7	WBGene00001243
F41H10.8	WBGene00001244
F42A6.9	WBGene00018330
F42D1.2	WBGene00009628
F42D1.3	WBGene00009629
F42E11.4	WBGene00006584
F42F12.3	WBGene00009635
F42F12.4	WBGene00009636
F42G2.6	WBGene00018355
F42G8.3	WBGene00004056
F42G9.9	WBGene00004212
F42H10.3	WBGene00018367
F43C1.4	WBGene00003619
F43C11.6	WBGene00018383
F43C11.9	WBGene00018386
F43C9.2	WBGene00018376
F43G6.10	WBGene00009662
F43G6.4	WBGene00009657
F43G6.7	WBGene00009659
F43G6.8	WBGene00009660
F44A6.2	WBGene00004786
F44A6.4	WBGene00009676
F44C8.6	WBGene00003646
F44D12.1	WBGene00009678
F44D12.9	WBGene00009686
F44G4.8	WBGene00009717
F45B8.1	WBGene00004354
F45B8.2	WBGene00004353
F45C12.15	WBGene00018446
F45C12.2	WBGene00018433
F45C12.7	WBGene00018438
F45D11.10	WBGene00018456
F45D11.9	WBGene00018455
F45D3.3	WBGene00009723
F45E1.6	WBGene00001945
F45E1.7	WBGene00018467
F45E10.2	WBGene00009729
F45E6.2	WBGene00000222
F45E6.3	WBGene00009726
F45F2.4	WBGene00001881
F46A9.6	WBGene00003172
F46C3.3	WBGene00002037
F46E10.1	WBGene00018488
F46F2.2	WBGene00002203
F46F6.1	WBGene00004375
F46F6.2	WBGene00009793
F46G11.3	WBGene00018516
F46H5.2	WBGene00018518
F46H5.4	WBGene00018520
F47A4.1	WBGene00009799
F47A4.5	WBGene00009801
F47B10.9	WBGene00009820
F47D12.6	WBGene00018562
F47G3.1	WBGene00018576
F47G3.2	WBGene00018577
F47G3.3	WBGene00018578
F47G4.2	WBGene00009823
F47G4.4	WBGene00009825
F47H4.1	WBGene00009834
F48B9.8	WBGene00018593
F48D6.1	WBGene00006393
F48E3.1	WBGene00001637
F48E3.4	WBGene00018605
F48F7.4	WBGene00004126
F48F7.6	WBGene00009851
F48G7.11	WBGene00018622
F48G7.4	WBGene00018615
F49B2.2	WBGene00009862
F49B2.5	WBGene00005078
F49E12.1	WBGene00009897
F49E12.2	WBGene00009898
F49E12.6	WBGene00009899
F49E2.1	WBGene00009885
F49E2.2	WBGene00009886
F49H12.1	WBGene00003087
F49H12.6	WBGene00018657
F52A8.4	WBGene00009917
F52B11.3	WBGene00009926
F52B11.6	WBGene00002117
F52D10.2	WBGene00009930
F52D2.2	WBGene00004351
F52D2.4	WBGene00001569
F52E1.9	WBGene00018697
F52E4.7	WBGene00018703
F52F12.6	WBGene00009939
F52G3.1	WBGene00018710
F52H2.1	WBGene00018714
F52H2.2	WBGene00000004
F52H2.5	WBGene00018717
F52H2.7	WBGene00018719
F52H3.1	WBGene00002497
F53A3.1	WBGene00018720
F53B2.6	WBGene00001820
F53B3.1	WBGene00018740
F53B3.5	WBGene00018743
F53C11.7	WBGene00009976
F53C11.8	WBGene00009977
F53E10.2	WBGene00000056
F53F4.5	WBGene00001479
F53F8.3	WBGene00010000
F53G12.13	WBGene00045049
F53H4.1	WBGene00000803
F53H4.2	WBGene00010007
F53H8.1	WBGene00000164
F53H8.2	WBGene00000195
F53H8.4	WBGene00004893
F54A5.1	WBGene00018786
F54A5.2	WBGene00018787
F54B11.3	WBGene00006816
F54B11.5	WBGene00010028
F54C4.3	WBGene00018794
F54C9.11	WBGene00010045
F54C9.4	WBGene00000615
F54D1.4	WBGene00003606
F54D10.1	WBGene00004821
F54D10.3	WBGene00018804
F54D10.7	WBGene00018808
F54D11.1	WBGene00018811
F54D11.3	WBGene00018813
F54D5.5	WBGene00010051
F54E2.3	WBGene00004130
F54E4.3	WBGene00010059
F54E7.5	WBGene00018828
F54F2.1	WBGene00003929
F54F3.1	WBGene00003738
F54F7.1	WBGene00006388
F54F7.2	WBGene00010064
F54F7.5	WBGene00003219
F54F7.6	WBGene00010066
F54H12.5	WBGene00018845
F55A4.2	WBGene00018854
F55A8.1	WBGene00001186
F55B11.2	WBGene00010084
F55B11.3	WBGene00010085
F55B11.5	WBGene00010087
F55B12.5	WBGene00003812
F55C10.1	WBGene00000554
F55D10.3	WBGene00018878
F55F3.2	WBGene00010116
F55G1.7	WBGene00018903
F56A11.3	WBGene00001165
F56A11.5	WBGene00018925
F56A6.2	WBGene00002040
F56A8.9	WBGene00185001
F56B3.3	WBGene00018929
F56B6.2	WBGene00004350
F56C11.1	WBGene00000253
F56D5.5	WBGene00010149
F56E10.1	WBGene00018975
F56F10.4	WBGene00018987
F56F3.6	WBGene00002100
F57C12.4	WBGene00003408
F57C12.5	WBGene00003407
F57C2.4	WBGene00010196
F57C7.1	WBGene00010199
F57C7.3	WBGene00004749
F57F4.4	WBGene00019017
F58A3.1	WBGene00002261
F58E1.13	WBGene00019044
F58G4.1	WBGene00019064
F58H1.5	WBGene00010288
F59A1.10	WBGene00010296
F59A3.1	WBGene00019074
F59A3.9	WBGene00019082
F59A7.12	WBGene00044520
F59A7.4	WBGene00001857
F59B1.8	WBGene00019100
F59C12.3	WBGene00019102
F59D12.5	WBGene00010332
F59D8.1	WBGene00006927
F59D8.2	WBGene00006928
F59F3.1	WBGene00006896
F59F4.4	WBGene00010339
F59F5.6	WBGene00006364
F59H6.14	WBGene00206415
H01A20.1	WBGene00003602
H01M10.1	WBGene00019143
H04M03.3	WBGene00019153
H06I04.6	WBGene00019170
H11E01.3	WBGene00019188
H12C20.3	WBGene00003658
H12D21.7	WBGene00010383
H13N06.4	WBGene00010397
H13N06.6	WBGene00006541
H20J04.3	WBGene00019218
H22K11.1	WBGene00000216
H24K24.5	WBGene00001480
H27C11.1	WBGene00003687
H28G03.1	WBGene00019249
H28G03.2	WBGene00019250
H28G03.6	WBGene00003477
H30A04.1	WBGene00001148
H37A05.4	WBGene00044200
H37N21.1	WBGene00010427
H38K22.5	WBGene00001631
H39E20.1	WBGene00019267
H42K12.1	WBGene00003965
K01A2.5	WBGene00019280
K01A6.2	WBGene00010444
K01D12.11	WBGene00010470
K01D12.12	WBGene00010471
K01G12.3	WBGene00010483
K02A2.3	WBGene00019289
K02B12.2	WBGene00010495
K02B9.1	WBGene00010492
K02B9.2	WBGene00010493
K02E10.2	WBGene00001844
K02F3.5	WBGene00019328
K02G10.1	WBGene00019344
K03A1.5	WBGene00006351
K03A11.1	WBGene00010519
K03B8.6	WBGene00010524
K03C7.2	WBGene00001441
K03D10.1	WBGene00002181
K03E6.7	WBGene00019365
K04A8.1	WBGene00019373
K04C1.2	WBGene00010552
K04C1.3	WBGene00010553
K04C1.5	WBGene00010555
K04G11.4	WBGene00010572
K04G2.10	WBGene00010568
K04H4.1	WBGene00001263
K05B2.2	WBGene00019403
K05B2.5	WBGene00003986
K05F1.5	WBGene00019407
K06A1.3	WBGene00019426
K06A1.4	WBGene00003621
K06A1.5	WBGene00019427
K06B9.6	WBGene00044478
K06G5.2	WBGene00010606
K07C11.3	WBGene00019476
K07C11.7	WBGene00019479
K07D4.7	WBGene00019487
K07D4.8	WBGene00004135
K07E3.2	WBGene00019491
K07E3.8	WBGene00006890
K07H8.6	WBGene00006930
K08B12.3	WBGene00019522
K08C7.1	WBGene00010646
K08C7.6	WBGene00010648
K08E5.1	WBGene00014801
K08E5.2	WBGene00003519
K08F11.2	WBGene00019542
K08F8.2	WBGene00000220
K08H2.1	WBGene00004827
K08H2.3	WBGene00010690
K08H2.6	WBGene00001995
K08H2.8	WBGene00003626
K09A9.1	WBGene00010700
K09A9.3	WBGene00010701
K09D9.12	WBGene00019569
K09E2.3	WBGene00019572
K09E2.4	WBGene00004369
K09E3.5	WBGene00019576
K09E3.7	WBGene00019578
K09E9.2	WBGene00010725
K09F5.2	WBGene00006925
K09F5.5	WBGene00019584
K09F5.6	WBGene00044698
K09H11.7	WBGene00019604
K10B2.2	WBGene00019605
K10B3.5	WBGene00019611
K10B3.9	WBGene00003124
K10C9.3	WBGene00019624
K10D2.7	WBGene00019633
K10D3.2	WBGene00006753
K10H10.2	WBGene00010759
K11D12.7	WBGene00019647
K11E4.5	WBGene00003661
K12F2.1	WBGene00003515
M01B2.10	WBGene00010803
M01D7.4	WBGene00006461
M01F1.7	WBGene00010813
M01G12.14	WBGene00010825
M02D8.3	WBGene00019729
M02D8.4	WBGene00019730
M02E1.1	WBGene00019733
M03A8.2	WBGene00019748
M03A8.4	WBGene00001572
M03B6.2	WBGene00010834
M03B6.4	WBGene00010836
M04C9.3	WBGene00010858
M04G12.1	WBGene00010867
M04G12.4	WBGene00010868
M04G7.3	WBGene00019774
M05B5.4	WBGene00010872
M05B5.5	WBGene00001949
M142.1	WBGene00006843
M142.5	WBGene00010922
M151.3	WBGene00019795
M151.4	WBGene00019796
M151.7	WBGene00019799
M151.9	WBGene00219238
M163.3	WBGene00001898
M163.4	WBGene00001583
M176.11	WBGene00010947
M199.2	WBGene00010951
R01E6.3	WBGene00000282
R02E4.2	WBGene00044021
R02F11.3	WBGene00019841
R03A10.1	WBGene00010981
R03A10.4	WBGene00010984
R03E1.1	WBGene00006369
R03G5.2	WBGene00004758
R03G5.6	WBGene00019847
R04A9.2	WBGene00019862
R04A9.4	WBGene00002060
R04A9.5	WBGene00019864
R04B3.2	WBGene00019867
R04B5.4	WBGene00003611
R04D3.2	WBGene00011010
R04D3.3	WBGene00011011
R04D3.4	WBGene00011012
R05D3.9	WBGene00019882
R05G6.10	WBGene00019902
R05G9.3	WBGene00019905
R06B10.5	WBGene00019915
R06C1.6	WBGene00011060
R07A4.1	WBGene00001202
R07B7.10	WBGene00011094
R07B7.11	WBGene00011095
R07B7.8	WBGene00011092
R07C12.2	WBGene00019932
R07C3.8	WBGene00019924
R07E3.2	WBGene00011103
R07E3.4	WBGene00011105
R07E3.5	WBGene00011106
R07E3.7	WBGene00011108
R07E4.3	WBGene00019937
R07E4.5	WBGene00019938
R08B4.3	WBGene00011139
R08E3.3	WBGene00019959
R09A8.1	WBGene00011152
R09A8.2	WBGene00011153
R09A8.3	WBGene00006493
R09A8.9	WBGene00219278
R09E10.7	WBGene00004140
R09F10.3	WBGene00019987
R09F10.5	WBGene00019988
R09F10.8	WBGene00019989
R09G11.2	WBGene00003600
R10D12.8	WBGene00011189
R10E12.2	WBGene00011221
R10E4.11	WBGene00011206
R10H10.3	WBGene00011222
R11.1	WBGene00011226
R11.4	WBGene00011229
R119.5	WBGene00020090
R11A5.3	WBGene00011231
R11A5.7	WBGene00011235
R12A1.2	WBGene00004925
R12B2.2	WBGene00020018
R12H7.2	WBGene00000217
R12H7.5	WBGene00004826
R13.3	WBGene00011258
R13.4	WBGene00011259
R13A5.7	WBGene00020050
R13F6.4	WBGene00006498
R13F6.9	WBGene00004857
R13G10.2	WBGene00000137
R148.5	WBGene00020104
R148.6	WBGene00006452
R151.5	WBGene00006592
R160.3	WBGene00020120
R186.6	WBGene00011307
R90.1	WBGene00011283
R90.5	WBGene00011287
T01B7.8	WBGene00011313
T01C1.2	WBGene00011315
T01D1.4	WBGene00020149
T01E8.1	WBGene00011331
T01E8.2	WBGene00004334
T01E8.3	WBGene00004038
T01G5.7	WBGene00011342
T02C5.3	WBGene00020160
T02E1.5	WBGene00000967
T02E1.8	WBGene00011380
T02G5.1	WBGene00020161
T02G6.5	WBGene00011388
T03D8.6	WBGene00011393
T03E6.7	WBGene00000776
T03F1.6	WBGene00020188
T03G11.4	WBGene00020197
T03G11.6	WBGene00020199
T03G6.2	WBGene00003630
T03G6.3	WBGene00020195
T04C10.1	WBGene00003149
T04C10.4	WBGene00000221
T04C9.4	WBGene00003375
T04D3.1	WBGene00011431
T04F8.6	WBGene00011444
T04G9.1	WBGene00020214
T04G9.4	WBGene00020215
T04G9.7	WBGene00020218
T05A10.1	WBGene00004862
T05A12.4	WBGene00020235
T05C1.4	WBGene00020251
T05C3.6	WBGene00020256
T05E7.5	WBGene00020261
T05F1.13	WBGene00011497
T05G11.1	WBGene00011505
T05G5.1	WBGene00011498
T05H10.4	WBGene00011509
T06D4.1	WBGene00020290
T06H11.4	WBGene00003384
T07C12.9	WBGene00011573
T07C4.6	WBGene00006546
T07D3.7	WBGene00000106
T07F12.2	WBGene00020322
T07H6.2	WBGene00003394
T08A9.1	WBGene00020334
T08A9.9	WBGene00004990
T08D10.1	WBGene00011614
T08D10.2	WBGene00011615
T08D2.2	WBGene00011607
T08H4.1	WBGene00006476
T09A5.2	WBGene00002216
T09B4.5	WBGene00020379
T09B9.1	WBGene00011642
T09B9.4	WBGene00011645
T10A3.1	WBGene00006750
T10B10.2	WBGene00011679
T10B10.3	WBGene00011680
T10B10.4	WBGene00011681
T10C6.16	WBGene00077607
T10D4.6	WBGene00020408
T10H10.2	WBGene00020426
T10H10.3	WBGene00020427
T10H9.5	WBGene00004062
T11F8.2	WBGene00020434
T11F9.12	WBGene00011713
T12A2.3	WBGene00020438
T12G3.2	WBGene00011738
T12G3.6	WBGene00011741
T13A10.10	WBGene00000005
T13B5.3	WBGene00020471
T13C5.5	WBGene00000245
T13C5.8	WBGene00077690
T13F2.8	WBGene00000301
T13G4.3	WBGene00020490
T13H2.4	WBGene00004148
T13H2.5	WBGene00020496
T13H5.1	WBGene00011755
T13H5.6	WBGene00011760
T14A8.1	WBGene00004363
T14B4.5	WBGene00020501
T14B4.7	WBGene00001072
T14F9.2	WBGene00020508
T14F9.4	WBGene00003968
T14G10.4	WBGene00011774
T14G12.3	WBGene00006408
T14G8.1	WBGene00000482
T15H9.6	WBGene00011791
T16H12.2	WBGene00011812
T17A3.2	WBGene00020540
T17H7.4	WBGene00003936
T18D3.1	WBGene00011820
T18H9.2	WBGene00000215
T18H9.5	WBGene00002132
T19A6.4	WBGene00011829
T19D12.6	WBGene00020581
T19D7.4	WBGene00020572
T20B3.15	WBGene00044331
T20D4.6	WBGene00020612
T20F10.1	WBGene00007047
T20F7.1	WBGene00020630
T20F7.6	WBGene00020633
T21B4.15	WBGene00043054
T21B4.17	WBGene00044032
T21C12.1	WBGene00006784
T21C12.2	WBGene00001993
T21D12.15	WBGene00206487
T21D12.4	WBGene00003932
T21G5.5	WBGene00006423
T21H3.5	WBGene00020664
T21H8.1	WBGene00011904
T22A3.2	WBGene00011906
T22A3.8	WBGene00002248
T22B11.4	WBGene00020678
T22B7.4	WBGene00020673
T22B7.5	WBGene00005718
T22B7.7	WBGene00020674
T22C8.3	WBGene00011924
T22D2.1	WBGene00006882
T23C6.1	WBGene00007011
T23C6.4	WBGene00020726
T23D8.1	WBGene00003397
T23F11.4	WBGene00011956
T23G4.1	WBGene00006580
T23H2.2	WBGene00004924
T23H4.2	WBGene00003659
T24B8.3	WBGene00011977
T24C12.4	WBGene00020766
T24C2.2	WBGene00011981
T24D5.2	WBGene00011990
T24E12.1	WBGene00020771
T24E12.11	WBGene00020778
T24H7.5	WBGene00020784
T25F10.2	WBGene00000936
T25F10.6	WBGene00020808
T25G12.4	WBGene00004270
T26C11.4	WBGene00020830
T26C11.6	WBGene00000444
T26C11.7	WBGene00000460
T26C11.9	WBGene00194679
T27A3.1	WBGene00020838
T27A8.1	WBGene00012073
T27A8.2	WBGene00012074
T27B1.1	WBGene00003883
T27B7.6	WBGene00020852
T27C4.2	WBGene00020855
T27D12.4	WBGene00003979
T27E4.2	WBGene00002017
T27E4.3	WBGene00002019
T27E4.8	WBGene00002015
T27E4.9	WBGene00002020
T27F2.2	WBGene00012100
T28A11.2	WBGene00020869
T28B4.1	WBGene00020884
T28D6.5	WBGene00012125
T28F12.2	WBGene00006796
T28H11.4	WBGene00003976
VC5.2	WBGene00020908
VF11C1L.1	WBGene00004089
W01A11.5	WBGene00020911
W01C8.4	WBGene00020920
W01C8.5	WBGene00020921
W01D2.2	WBGene00003651
W01G7.1	WBGene00000901
W02A11.4	WBGene00006700
W02A11.8	WBGene00012196
W02A2.2	WBGene00001390
W02B8.2	WBGene00012198
W02C12.3	WBGene00020930
W02D3.7	WBGene00002257
W02D7.5	WBGene00020941
W02D9.10	WBGene00012216
W02D9.7	WBGene00012213
W02H5.1	WBGene00020956
W03F8.1	WBGene00006586
W03G11.4	WBGene00012226
W04A8.5	WBGene00012240
W04E12.2	WBGene00012247
W04G3.13	WBGene00194793
W04G3.3	WBGene00012257
W04H10.3	WBGene00003599
W05B5.1	WBGene00012274
W05F2.4	WBGene00021036
W05H7.1	WBGene00021044
W05H7.4	WBGene00021047
W05H9.4	WBGene00021051
W06A7.2	WBGene00012291
W06B11.2	WBGene00004245
W06B3.1	WBGene00012295
W06D11.1	WBGene00012299
W06D11.3	WBGene00012301
W06D12.3	WBGene00001397
W07A12.7	WBGene00012324
W07B8.5	WBGene00000785
W07E11.1	WBGene00012326
W08A12.3	WBGene00021080
W08E3.2	WBGene00012343
W08F4.11	WBGene00021100
W09C2.3	WBGene00003151
W09C5.5	WBGene00012352
W09G12.1	WBGene00001104
W10C8.2	WBGene00004077
Y102A11A.8	WBGene00022418
Y105C5B.13	WBGene00004816
Y105C5B.19	WBGene00013658
Y105C5B.20	WBGene00013659
Y105C5B.21	WBGene00002175
Y105E8A.14	WBGene00013674
Y105E8A.25	WBGene00013682
Y105E8A.26	WBGene00013683
Y106G6D.1	WBGene00013698
Y106G6D.8	WBGene00013704
Y108G3AL.7	WBGene00044689
Y110A2AL.1	WBGene00022438
Y110A2AL.4	WBGene00022441
Y110A2AL.8	WBGene00004210
Y111B2A.12	WBGene00013735
Y111B2A.21	WBGene00013741
Y113G7A.4	WBGene00003566
Y116A8C.22	WBGene00013799
Y119C1B.10	WBGene00022475
Y119C1B.5	WBGene00022471
Y11D7A.13	WBGene00012436
Y13C8A.2	WBGene00021189
Y13C8A.4	WBGene00219303
Y17D7A.3	WBGene00003655
Y17D7B.4	WBGene00012452
Y17G7B.21	WBGene00012472
Y19D10A.1	WBGene00021216
Y19D10A.16	WBGene00044734
Y20C6A.2	WBGene00012492
Y20F4.2	WBGene00021237
Y20F4.3	WBGene00021238
Y22D7AL.9	WBGene00021247
Y22D7AR.11	WBGene00021264
Y22D7AR.13	WBGene00004779
Y23H5A.5	WBGene00000832
Y26E6A.1	WBGene00012512
Y26E6A.2	WBGene00012513
Y26E6A.3	WBGene00012514
Y27F2A.3	WBGene00005552
Y32F6A.5	WBGene00012530
Y32G9B.1	WBGene00021309
Y32H12A.6	WBGene00021314
Y34B4A.11	WBGene00045435
Y34B4A.3	WBGene00002031
Y34B4A.7	WBGene00021323
Y34D9A.7	WBGene00021332
Y34D9B.1	WBGene00003238
Y37A1A.3	WBGene00012536
Y37A1B.17	WBGene00044989
Y37D8A.4	WBGene00012546
Y37E11AR.1	WBGene00021368
Y37E11AR.6	WBGene00006869
Y37E3.13	WBGene00021353
Y37F4.7	WBGene00021388
Y38C1AA.4	WBGene00006561
Y38E10A.14	WBGene00012592
Y38E10A.22	WBGene00012600
Y38E10A.3	WBGene00012581
Y38F1A.5	WBGene00000870
Y38F1A.9	WBGene00003860
Y38H6C.10	WBGene00012623
Y39A1A.5	WBGene00012644
Y39A3CL.6	WBGene00004249
Y39B6A.10	WBGene00012672
Y39B6A.2	WBGene00012665
Y39B6A.20	WBGene00000214
Y39D8B.3	WBGene00021451
Y39G10AR.11	WBGene00021469
Y39G8B.2	WBGene00012723
Y39H10A.2	WBGene00021479
Y41D4B.27	WBGene00045255
Y41D4B.9	WBGene00003712
Y43F11A.1	WBGene00012841
Y43F11A.4	WBGene00012844
Y43F8B.2	WBGene00012813
Y45F10B.13	WBGene00012875
Y45F3A.4	WBGene00012861
Y45G5AM.1	WBGene00003704
Y46B2A.1	WBGene00021576
Y46G5A.15	WBGene00012906
Y46G5A.8	WBGene00012900
Y46H3A.2	WBGene00002018
Y46H3C.5	WBGene00021605
Y47D3A.6	WBGene00006604
Y47D3B.10	WBGene00001077
Y47D3B.11	WBGene00012944
Y47D3B.7	WBGene00004735
Y47D3B.9	WBGene00012943
Y47D7A.1	WBGene00004813
Y47D7A.8	WBGene00004820
Y47D9A.2	WBGene00021629
Y47G6A.31	WBGene00044436
Y47G7B.2	WBGene00021654
Y47H9C.10	WBGene00012953
Y48A6A.1	WBGene00006982
Y48A6C.3	WBGene00012976
Y48B6A.10	WBGene00012981
Y48C3A.12	WBGene00012994
Y48C3A.3	WBGene00012987
Y48E1B.7	WBGene00013006
Y48G10A.6	WBGene00013023
Y48G1C.6	WBGene00021679
Y48G1C.8	WBGene00021681
Y48G8AL.5	WBGene00021686
Y49A10A.2	WBGene00044949
Y49A3A.1	WBGene00013024
Y49F6B.1	WBGene00021714
Y49F6B.10	WBGene00000647
Y49F6C.3	WBGene00021725
Y49F6C.8	WBGene00021730
Y4C6B.5	WBGene00021159
Y4C6B.7	WBGene00021161
Y50D4C.4	WBGene00005024
Y51A2D.15	WBGene00013082
Y51A2D.17	WBGene00003660
Y51F10.11	WBGene00044438
Y51H7C.15	WBGene00044439
Y52B11A.8	WBGene00013127
Y53F4B.29	WBGene00001774
Y54E2A.10	WBGene00013195
Y54F10AM.11	WBGene00021853
Y54F10BM.9	WBGene00021863
Y54G11A.7	WBGene00013216
Y54G2A.16	WBGene00021881
Y55B1BR.3	WBGene00021913
Y55F3BR.5	WBGene00021942
Y56A3A.1	WBGene00003826
Y56A3A.33	WBGene00013244
Y56A3A.36	WBGene00044233
Y57A10A.9	WBGene00013254
Y57A10B.6	WBGene00013278
Y57G11A.1	WBGene00013289
Y57G11B.2	WBGene00013295
Y57G11C.24	WBGene00001330
Y57G11C.25	WBGene00013319
Y57G11C.47	WBGene00013336
Y57G7A.2	WBGene00021966
Y58A7A.1	WBGene00021975
Y59C2A.1	WBGene00021984
Y59E1A.2	WBGene00021988
Y60A3A.1	WBGene00006786
Y62E10A.17	WBGene00013383
Y62H9A.4	WBGene00013392
Y62H9A.5	WBGene00013393
Y62H9A.6	WBGene00013394
Y63D3A.2	WBGene00013403
Y66C5A.1	WBGene00044156
Y66D12A.12	WBGene00013438
Y67A10A.4	WBGene00013453
Y67D8B.4	WBGene00022063
Y69H2.6	WBGene00006714
Y6G8.3	WBGene00012405
Y71A12B.10	WBGene00013507
Y71A12B.12	WBGene00013509
Y71F9AR.1	WBGene00000237
Y71F9B.5	WBGene00003006
Y71F9B.8	WBGene00022129
Y71G12B.20	WBGene00003111
Y71G12B.23	WBGene00022158
Y71G12B.35	WBGene00185098
Y71G12B.6	WBGene00022146
Y71H10A.1	WBGene00022199
Y71H2B.3	WBGene00022193
Y71H9A.3	WBGene00006066
Y73B3A.1	WBGene00022203
Y73B3A.10	WBGene00022212
Y73B3A.4	WBGene00022206
Y73B6BL.13	WBGene00003237
Y73B6BL.288	WBGene00219218
Y73E7A.3	WBGene00022270
Y73F8A.13	WBGene00013522
Y75B8A.17	WBGene00013552
Y75D11A.3	WBGene00022292
Y77E11A.12	WBGene00022313
Y79H2A.1	WBGene00000273
Y82E9BR.15	WBGene00001236
Y87G2A.17	WBGene00013603
Y92H12BL.4	WBGene00022365
Y94H6A.10	WBGene00022382
Y9D1A.1	WBGene00021186
Y9D1A.2	WBGene00021187
ZC13.1	WBGene00022502
ZC168.1	WBGene00003568
ZC204.2	WBGene00022554
ZC308.4	WBGene00022586
ZC317.1	WBGene00022587
ZC373.1	WBGene00013866
ZC373.2	WBGene00013867
ZC376.4	WBGene00013876
ZC410.5	WBGene00013882
ZC416.2	WBGene00022609
ZC449.3	WBGene00022613
ZC477.9	WBGene00000942
ZC504.3	WBGene00013917
ZC53.7	WBGene00004352
ZC64.2	WBGene00022515
ZC64.3	WBGene00000441
ZC8.3	WBGene00022499
ZC8.6	WBGene00022501
ZC84.3	WBGene00013847
ZK1010.10	WBGene00164985
ZK1055.2	WBGene00022843
ZK1058.9	WBGene00014207
ZK1067.1	WBGene00002299
ZK1098.3	WBGene00014220
ZK112.7	WBGene00000395
ZK1193.2	WBGene00022858
ZK1236.3	WBGene00023405
ZK1248.16	WBGene00002268
ZK1290.5	WBGene00022887
ZK1290.8	WBGene00006956
ZK1320.11	WBGene00014259
ZK1320.6	WBGene00000180
ZK1321.2	WBGene00014261
ZK154.5	WBGene00022667
ZK154.7	WBGene00000075
ZK177.1	WBGene00022669
ZK185.5	WBGene00044481
ZK287.2	WBGene00013963
ZK370.6	WBGene00022720
ZK377.2	WBGene00004729
ZK455.1	WBGene00000040
ZK470.5	WBGene00006410
ZK512.1	WBGene00013982
ZK525.2	WBGene00000179
ZK546.15	WBGene00006619
ZK563.5	WBGene00022769
ZK6.11	WBGene00022645
ZK637.11	WBGene00000388
ZK652.8	WBGene00022786
ZK662.3	WBGene00003638
ZK673.10	WBGene00014064
ZK678.1	WBGene00023498
ZK688.6	WBGene00022801
ZK688.7	WBGene00022802
ZK697.2	WBGene00022805
ZK721.1	WBGene00006477
ZK783.4	WBGene00001470
ZK792.8	WBGene00014080
ZK795.1	WBGene00014081
ZK813.1	WBGene00022820
ZK813.3	WBGene00022822
ZK813.7	WBGene00045394
ZK822.2	WBGene00014090
ZK822.5	WBGene00014092
ZK829.5	WBGene00006555
ZK829.9	WBGene00014097
ZK84.3	WBGene00002088
ZK945.4	WBGene00014166
ZK970.1	WBGene00014171
ZK971.1	WBGene00014175
linc020	NAN
linc022	NAN
linc063	NAN

## Sheet: Male specific
geneNames	wbgene
AC3.10	WBGene00004964
AC3.12	WBGene00077503
AC7.3	WBGene00014997
AH10.1	WBGene00007082
AH6.2	WBGene00007080
AH6.3	WBGene00007081
B0025.5	WBGene00194700
B0034.4	WBGene00015004
B0041.1	WBGene00015006
B0041.6	WBGene00015010
B0205.10	WBGene00015024
B0205.13	WBGene00044644
B0205.14	WBGene00044646
B0207.1	WBGene00015026
B0207.11	WBGene00015034
B0207.7	WBGene00015030
B0207.9	WBGene00015032
B0212.4	WBGene00015038
B0218.5	WBGene00015049
B0218.7	WBGene00015051
B0222.10	WBGene00015058
B0222.9	WBGene00015057
B0240.2	WBGene00007117
B0244.9	WBGene00015084
B0252.5	WBGene00015089
B0261.5	WBGene00015093
B0261.6	WBGene00015094
B0261.9	WBGene00195057
B0273.1	WBGene00015097
B0273.115	WBGene00206473
B0280.11	WBGene00015106
B0280.17	WBGene00044674
B0285.7	WBGene00007139
B0286.1	WBGene00015115
B0286.2	WBGene00002252
B0334.10	WBGene00007148
B0361.11	WBGene00015165
B0379.2	WBGene00007156
B0379.7	WBGene00007159
B0393.4	WBGene00007169
B0432.11	WBGene00015192
B0432.12	WBGene00015193
B0454.26	WBGene00206372
B0454.5	WBGene00015196
B0457.4	WBGene00007179
B0491.3	WBGene00007190
B0496.1	WBGene00015210
B0496.2	WBGene00015211
B0496.6	WBGene00015215
B0511.3	WBGene00015229
B0511.4	WBGene00015230
B0513.6	WBGene00007198
B0523.1	WBGene00002212
B0524.2	WBGene00015241
B0524.4	WBGene00015243
B0524.5	WBGene00015244
B0545.3	WBGene00015246
B0564.6	WBGene00007206
B0564.9	WBGene00007208
BE10.1	WBGene00007209
BE10.5	WBGene00044127
C01A2.6	WBGene00007218
C01B10.44	WBGene00194839
C01B12.4	WBGene00015287
C01B4.7	WBGene00015271
C01B4.9	WBGene00015273
C01B9.4	WBGene00194890
C01F6.2	WBGene00007222
C01G10.1	WBGene00007230
C01G10.14	WBGene00007239
C01G10.17	WBGene00044658
C01G12.13	WBGene00044333
C01G12.16	WBGene00219299
C01G12.8	WBGene00007248
C01G12.9	WBGene00007249
C01G5.3	WBGene00015305
C01G5.4	WBGene00015306
C01G6.2	WBGene00007224
C01G8.9	WBGene00002717
C01H6.6	WBGene00007255
C02B10.6	WBGene00015331
C02F5.2	WBGene00015345
C02F5.5	WBGene00015348
C02G6.2	WBGene00015360
C02H7.1	WBGene00001127
C03B8.3	WBGene00015386
C03C10.2	WBGene00007269
C03C11.1	WBGene00007274
C03G6.19	WBGene00005647
C04C3.4	WBGene00015414
C04C3.9	WBGene00195067
C04E12.2	WBGene00015433
C04E12.8	WBGene00006012
C04E6.4	WBGene00015421
C04E6.5	WBGene00015422
C04E7.3	WBGene00015430
C04F12.12	WBGene00077685
C04F12.16	WBGene00219286
C04F12.6	WBGene00007300
C04F12.7	WBGene00007301
C04G2.10	WBGene00007309
C04G2.2	WBGene00007305
C04G2.4	WBGene00003432
C04G2.5	WBGene00007306
C04G2.7	WBGene00001204
C04G2.8	WBGene00007307
C04G2.9	WBGene00007308
C04H5.2	WBGene00007313
C04H5.7	WBGene00007315
C05B5.1	WBGene00007319
C05B5.11	WBGene00045242
C05B5.12	WBGene00194886
C05B5.2	WBGene00007320
C05B5.6	WBGene00007323
C05B5.7	WBGene00004344
C05B5.8	WBGene00007324
C05C10.8	WBGene00086567
C05C12.1	WBGene00007335
C05C12.5	WBGene00007337
C05D10.3	WBGene00015479
C05D11.5	WBGene00015483
C05D12.1	WBGene00007339
C05D2.3	WBGene00015467
C06A1.3	WBGene00007354
C06A5.2	WBGene00015500
C06A6.7	WBGene00015511
C06A8.6	WBGene00015516
C06B3.16	WBGene00189947
C06B8.7	WBGene00007372
C06C3.10	WBGene00044169
C06C3.3	WBGene00007374
C06C3.8	WBGene00007378
C06C6.5	WBGene00003640
C06C6.6	WBGene00007380
C06C6.7	WBGene00007381
C06C6.8	WBGene00007382
C06C6.9	WBGene00007383
C06E1.11	WBGene00015526
C06E1.7	WBGene00015522
C06E2.9	WBGene00044579
C06E7.6	WBGene00004973
C06G4.4	WBGene00015558
C06H2.5	WBGene00007389
C07A4.1	WBGene00007396
C07A9.13	WBGene00044227
C07A9.5	WBGene00007401
C07E3.4	WBGene00007415
C07G1.6	WBGene00015572
C07H6.3	WBGene00015580
C07H6.9	WBGene00015582
C08B11.4	WBGene00003813
C08B6.3	WBGene00007424
C08B6.6	WBGene00007427
C08E3.14	WBGene00044415
C08F11.10	WBGene00007457
C08F8.4	WBGene00007446
C08F8.6	WBGene00007448
C08F8.8	WBGene00003657
C08G5.1	WBGene00015614
C08G5.2	WBGene00015615
C08G5.3	WBGene00015616
C09B9.2	WBGene00015627
C09B9.3	WBGene00015628
C09B9.4	WBGene00015629
C09B9.6	WBGene00003448
C09B9.7	WBGene00015630
C09D4.1	WBGene00015632
C09D4.3	WBGene00015634
C09D4.9	WBGene00206357
C09F9.1	WBGene00007478
C09G5.4	WBGene00000616
C09G5.7	WBGene00007489
C09G9.4	WBGene00006409
C09H10.1	WBGene00004455
C09H10.9	WBGene00007503
C09H5.7	WBGene00015661
C10A4.3	WBGene00015664
C10A4.4	WBGene00015665
C10A4.5	WBGene00015666
C10B5.3	WBGene00015671
C10C6.3	WBGene00007512
C10C6.7	WBGene00007515
C10F3.4	WBGene00015678
C10G11.1	WBGene00015685
C10G11.10	WBGene00015690
C10G11.8	WBGene00015688
C10G11.9	WBGene00015689
C10H11.7	WBGene00015696
C10H11.8	WBGene00015697
C12D5.2	WBGene00015705
C12D8.9	WBGene00007538
C13C4.5	WBGene00007549
C14A4.13	WBGene00007563
C14A4.8	WBGene00007559
C14A6.12	WBGene00050955
C14A6.13	WBGene00050956
C14A6.2	WBGene00007566
C14A6.3	WBGene00007567
C14A6.5	WBGene00007569
C14A6.6	WBGene00007570
C14A6.7	WBGene00007571
C14A6.8	WBGene00007572
C14C10.1	WBGene00007584
C14C11.1	WBGene00015765
C14F11.5	WBGene00002024
C14F11.7	WBGene00015782
C14H10.3	WBGene00007593
C15A11.2	WBGene00007597
C15A11.7	WBGene00007599
C15C6.2	WBGene00007601
C15H11.1	WBGene00007613
C15H11.10	WBGene00007618
C15H11.13	WBGene00077576
C15H7.3	WBGene00007610
C15H7.4	WBGene00007611
C16A11.7	WBGene00015820
C16C10.12	WBGene00007631
C16C10.13	WBGene00007632
C16C10.9	WBGene00007629
C16C8.10	WBGene00015848
C16C8.18	WBGene00015855
C16C8.19	WBGene00015856
C16C8.22	WBGene00195072
C16C8.7	WBGene00015845
C16C8.8	WBGene00015846
C16C8.9	WBGene00015847
C16D2.1	WBGene00007633
C16D9.5	WBGene00015860
C17C3.11	WBGene00015893
C17C3.15	WBGene00015896
C17C3.5	WBGene00015890
C17C3.9	WBGene00015892
C17D12.5	WBGene00007639
C17D12.6	WBGene00004963
C17E4.1	WBGene00007641
C17F3.1	WBGene00015907
C17F3.3	WBGene00015908
C17G1.1	WBGene00007648
C17G10.3	WBGene00015917
C17H12.12	WBGene00015937
C17H12.3	WBGene00015929
C17H12.5	WBGene00015931
C17H12.9	WBGene00015934
C18A3.6	WBGene00004267
C18A3.7	WBGene00015944
C18A3.9	WBGene00015945
C18E3.1	WBGene00015970
C18E9.8	WBGene00007688
C18G1.3	WBGene00015982
C18G1.9	WBGene00015987
C18H2.1	WBGene00015988
C18H2.3	WBGene00015990
C18H2.4	WBGene00015991
C18H2.5	WBGene00015992
C18H7.4	WBGene00015994
C18H7.7	WBGene00015997
C23F12.1	WBGene00016006
C23G10.1	WBGene00016010
C23H3.2	WBGene00016018
C24A11.1	WBGene00016040
C24D10.1	WBGene00016053
C24D10.2	WBGene00016054
C24D10.7	WBGene00016058
C24D10.8	WBGene00043147
C24F3.5	WBGene00000019
C24H11.1	WBGene00007699
C24H11.2	WBGene00007700
C24H11.9	WBGene00007704
C24H12.6	WBGene00016075
C25A1.2	WBGene00001442
C25A6.1	WBGene00016081
C25A8.2	WBGene00016083
C25A8.5	WBGene00016085
C25D7.1	WBGene00007714
C25D7.12	WBGene00007721
C25D7.16	WBGene00050940
C25F9.8	WBGene00007727
C25G4.6	WBGene00007733
C25G4.7	WBGene00007734
C25G4.8	WBGene00007735
C25H3.1	WBGene00016111
C25H3.15	WBGene00044391
C25H3.16	WBGene00044392
C26B2.2	WBGene00016125
C26C6.10	WBGene00077553
C26C6.6	WBGene00007740
C26C6.9	WBGene00007743
C26D10.3	WBGene00007744
C26D10.5	WBGene00001159
C26E1.3	WBGene00007749
C26E6.1	WBGene00016137
C26F1.5	WBGene00001719
C27A2.5	WBGene00016153
C27A7.1	WBGene00007753
C27B7.6	WBGene00007763
C27B7.7	WBGene00007764
C27D6.11	WBGene00044388
C27D6.3	WBGene00016161
C27D8.1	WBGene00007777
C27D8.2	WBGene00007778
C27F2.6	WBGene00016168
C28A5.3	WBGene00003590
C28C12.1	WBGene00016177
C28C12.11	WBGene00016181
C28C12.3	WBGene00016179
C28D4.4	WBGene00007792
C28D4.5	WBGene00007793
C28D4.7	WBGene00007794
C28D4.8	WBGene00007795
C28F5.1	WBGene00016183
C28F5.4	WBGene00016185
C29E4.14	WBGene00044634
C29E4.17	WBGene00194730
C29E6.2	WBGene00007801
C29E6.3	WBGene00004084
C29E6.5	WBGene00003633
C29F3.1	WBGene00001150
C29F5.2	WBGene00016211
C29F5.3	WBGene00016212
C29F9.12	WBGene00016226
C29F9.5	WBGene00016220
C29H12.6	WBGene00016237
C30A5.4	WBGene00016239
C30A5.5	WBGene00004899
C30B5.3	WBGene00000771
C30B5.5	WBGene00016246
C30G7.3	WBGene00044177
C30H6.2	WBGene00006487
C30H6.3	WBGene00007821
C31C9.8	WBGene00045289
C31E10.8	WBGene00007849
C31H1.1	WBGene00016286
C31H1.2	WBGene00016287
C31H1.5	WBGene00016288
C31H2.1	WBGene00016292
C31H5.5	WBGene00007856
C31H5.7	WBGene00007858
C32C4.3	WBGene00007863
C32D5.2	WBGene00004860
C32D5.4	WBGene00016312
C32E12.1	WBGene00016327
C32E8.1	WBGene00016320
C32E8.4	WBGene00016322
C32H11.7	WBGene00007870
C33A11.1	WBGene00007877
C33A12.15	WBGene00007888
C33C12.12	WBGene00219322
C33C12.4	WBGene00016336
C33C12.5	WBGene00016337
C33C12.7	WBGene00016339
C33D9.2	WBGene00007897
C33D9.3	WBGene00007898
C33F10.1	WBGene00016351
C33F10.11	WBGene00016357
C33F10.12	WBGene00016358
C33F10.8	WBGene00016356
C33F10.9	WBGene00003435
C33G3.5	WBGene00007905
C33H5.16	WBGene00016382
C34B2.3	WBGene00016388
C34B2.4	WBGene00016389
C34C6.2	WBGene00007915
C34D4.1	WBGene00016397
C34D4.2	WBGene00016398
C34D4.3	WBGene00016399
C34E10.9	WBGene00016410
C34E7.3	WBGene00007933
C34F11.1	WBGene00016413
C34F11.2	WBGene00016414
C34F11.4	WBGene00003443
C34F11.5	WBGene00016416
C34F11.6	WBGene00003442
C34G6.3	WBGene00016420
C35A11.2	WBGene00016429
C35A5.4	WBGene00007948
C35D10.11	WBGene00016447
C35D10.2	WBGene00016440
C35D10.3	WBGene00016441
C35E7.10	WBGene00016462
C35E7.7	WBGene00016459
C36A4.1	WBGene00007963
C36A4.2	WBGene00007964
C36A4.3	WBGene00014697
C36A4.6	WBGene00007967
C36B1.10	WBGene00007977
C36F7.5	WBGene00007986
C36H8.1	WBGene00007987
C37A2.3	WBGene00016491
C38C10.3	WBGene00008001
C38C3.3	WBGene00016512
C38C3.7	WBGene00016515
C38C6.5	WBGene00007998
C38D4.7	WBGene00008007
C38D9.5	WBGene00008013
C38H2.2	WBGene00008019
C39H7.1	WBGene00016541
C40H1.4	WBGene00001242
C40H5.1	WBGene00043187
C40H5.5	WBGene00006654
C41C4.10	WBGene00044049
C41D11.10	WBGene00195180
C41G7.15	WBGene00219284
C41G7.6	WBGene00008063
C42C1.3	WBGene00016581
C42C1.7	WBGene00016585
C42D4.1	WBGene00016594
C42D4.4	WBGene00006109
C43E11.5	WBGene00016605
C43F9.10	WBGene00008077
C43F9.6	WBGene00008074
C43G2.3	WBGene00016612
C43G2.4	WBGene00016613
C44B9.2	WBGene00008079
C44C10.11	WBGene00043985
C44C10.15	WBGene00219301
C44C10.9	WBGene00008089
C44C11.6	WBGene00206479
C44C8.1	WBGene00016646
C44C8.2	WBGene00016647
C44C8.3	WBGene00016648
C44C8.4	WBGene00016649
C44F1.2	WBGene00008092
C44F1.3	WBGene00002267
C45B11.5	WBGene00008106
C45B11.8	WBGene00077699
C45B11.9	WBGene00185117
C45G9.10	WBGene00016681
C45G9.15	WBGene00050919
C45G9.4	WBGene00016675
C45G9.8	WBGene00016679
C45G9.9	WBGene00016680
C46A5.1	WBGene00016698
C46C2.3	WBGene00008111
C46C2.6	WBGene00008114
C46E10.1	WBGene00016707
C46G7.5	WBGene00044502
C46H11.10	WBGene00016734
C46H11.6	WBGene00016730
C47A4.3	WBGene00008124
C47A4.5	WBGene00008125
C47B2.1	WBGene00008130
C47D12.3	WBGene00008137
C47E12.10	WBGene00008153
C47E12.11	WBGene00008154
C47E12.12	WBGene00008155
C47E8.1	WBGene00008141
C47E8.11	WBGene00044180
C47G2.2	WBGene00006853
C48B6.4	WBGene00016742
C48D1.9	WBGene00194643
C48E7.7	WBGene00016752
C48E7.8	WBGene00016753
C48E7.9	WBGene00006689
C49A1.2	WBGene00008185
C49A1.3	WBGene00008186
C49A9.1	WBGene00016755
C49C3.1	WBGene00004908
C49C3.20	WBGene00185097
C49C8.1	WBGene00016765
C49C8.6	WBGene00016770
C49D10.10	WBGene00016778
C49F8.1	WBGene00008213
C49G7.1	WBGene00016780
C49G7.12	WBGene00077593
C50A2.2	WBGene00016796
C50A2.3	WBGene00016797
C50C3.2	WBGene00016800
C50C3.5	WBGene00016801
C50C3.9	WBGene00006772
C50D2.3	WBGene00016807
C50E10.1	WBGene00016825
C50E10.2	WBGene00016826
C50F2.5	WBGene00016839
C50F4.10	WBGene00008235
C50F4.2	WBGene00008230
C50F7.3	WBGene00016843
C50H2.2	WBGene00001211
C50H2.7	WBGene00008243
C51E3.10	WBGene00008255
C51E3.6	WBGene00008252
C51E3.7	WBGene00001172
C52B11.4	WBGene00016873
C52D10.11	WBGene00001460
C52E12.6	WBGene00016890
C52E4.12	WBGene00194785
C52E4.5	WBGene00008258
C52E4.7	WBGene00008259
C53A5.4	WBGene00007049
C53A5.6	WBGene00008266
C53B4.2	WBGene00008272
C53B4.7	WBGene00000266
C53C11.3	WBGene00004220
C53D5.2	WBGene00016903
C53D6.10	WBGene00023424
C53D6.5	WBGene00008282
C54C6.11	WBGene00219296
C54D1.6	WBGene00000238
C54D10.4	WBGene00008299
C54E10.10	WBGene00206523
C54E10.11	WBGene00206524
C54E10.5	WBGene00008309
C54F6.8	WBGene00016926
C54G4.2	WBGene00008312
C54G4.3	WBGene00008313
C54G6.5	WBGene00005002
C55A1.6	WBGene00008323
C55A6.11	WBGene00008340
C55A6.3	WBGene00008332
C55A6.4	WBGene00008333
C55A6.7	WBGene00008336
C55B7.10	WBGene00016946
C55B7.3	WBGene00016942
C55C2.2	WBGene00006047
C55C2.3	WBGene00016949
C55C2.4	WBGene00016950
C55C3.3	WBGene00016953
C55C3.4	WBGene00016954
C55C3.6	WBGene00016956
C55C3.8	WBGene00044501
C56C10.12	WBGene00016968
C56C10.6	WBGene00016963
C56G3.2	WBGene00016985
CD4.1	WBGene00016988
D1005.5	WBGene00016999
D1014.2	WBGene00017015
D1022.9	WBGene00044300
D1037.3	WBGene00001501
D1037.5	WBGene00017026
D1054.5	WBGene00008372
D1081.10	WBGene00045508
D1081.11	WBGene00050879
D1081.12	WBGene00086554
D1081.3	WBGene00008381
D1081.4	WBGene00008382
D1081.5	WBGene00008383
D1086.17	WBGene00045355
D2024.1	WBGene00017050
D2024.7	WBGene00017054
D2045.5	WBGene00008423
D2045.7	WBGene00008424
D2045.9	WBGene00008426
D2062.1	WBGene00017055
D2062.12	WBGene00044301
D2062.13	WBGene00194711
D2062.4	WBGene00017056
D2062.5	WBGene00017057
D2062.6	WBGene00017058
D2062.7	WBGene00017059
D2063.4	WBGene00044529
D2089.2	WBGene00008433
D2092.1	WBGene00017063
D2092.7	WBGene00006645
D2096.13	WBGene00044953
D2096.5	WBGene00017072
DH11.5	WBGene00008438
E01A2.3	WBGene00003029
E02A10.2	WBGene00001732
E02H9.1	WBGene00017099
E02H9.4	WBGene00017102
E02H9.9	WBGene00017106
E03A3.4	WBGene00001944
E03A3.6	WBGene00006811
E03H12.10	WBGene00006038
E03H12.5	WBGene00017112
E03H12.7	WBGene00017114
EGAP1.3	WBGene00006987
F01D4.3	WBGene00008487
F01D4.4	WBGene00001189
F01D5.7	WBGene00008497
F01D5.8	WBGene00008498
F01G10.5	WBGene00008508
F02C9.1	WBGene00017172
F02C9.4	WBGene00017175
F02D8.4	WBGene00008521
F02E11.1	WBGene00017179
F02E9.3	WBGene00008529
F02G3.1	WBGene00017184
F07A11.5	WBGene00008548
F07A5.2	WBGene00008541
F07B10.1	WBGene00000539
F07D3.2	WBGene00001449
F07D3.3	WBGene00008556
F07E5.4	WBGene00017209
F07E5.6	WBGene00017211
F07E5.8	WBGene00017213
F07F6.1	WBGene00017215
F07F6.2	WBGene00017216
F07F6.4	WBGene00017217
F07G11.4	WBGene00017231
F07G6.8	WBGene00017227
F08A8.8	WBGene00045468
F08B1.2	WBGene00001538
F08B12.4	WBGene00008572
F08B4.2	WBGene00000397
F08F1.9	WBGene00017259
F08F3.8	WBGene00017264
F08F8.1	WBGene00017267
F08F8.6	WBGene00017271
F08G2.1	WBGene00001918
F08G2.6	WBGene00002120
F08G5.2	WBGene00008581
F08H9.2	WBGene00008590
F09C12.7	WBGene00003462
F09C12.8	WBGene00017279
F09C3.2	WBGene00008610
F09C6.10	WBGene00008620
F09E10.1	WBGene00017294
F09E10.8	WBGene00017298
F09E5.10	WBGene00017288
F09E5.12	WBGene00017290
F09E5.9	WBGene00017287
F09E8.1	WBGene00008623
F09F7.5	WBGene00017302
F09G2.1	WBGene00017310
F09G2.3	WBGene00017312
F09G8.4	WBGene00003562
F10C1.2	WBGene00002053
F10C1.3	WBGene00017325
F10D11.3	WBGene00008649
F10D11.4	WBGene00008650
F10D11.5	WBGene00008651
F10D2.10	WBGene00017335
F10D7.4	WBGene00017341
F10E9.12	WBGene00017361
F10E9.2	WBGene00017354
F10F2.7	WBGene00008659
F10F2.8	WBGene00008660
F10G2.7	WBGene00017366
F10G7.12	WBGene00044744
F10G7.6	WBGene00017370
F10G8.2	WBGene00008662
F11A1.3	WBGene00000908
F11A6.1	WBGene00002232
F11F1.1	WBGene00008714
F11G11.13	WBGene00017388
F11G11.14	WBGene00044384
F11G11.4	WBGene00017384
F11G11.8	WBGene00017386
F11G11.9	WBGene00017387
F12A10.4	WBGene00017393
F12A10.6	WBGene00017395
F12B6.1	WBGene00000020
F13A2.2	WBGene00017411
F13A2.5	WBGene00017414
F13A2.6	WBGene00017415
F13A7.1	WBGene00008724
F13A7.7	WBGene00008725
F13B12.7	WBGene00008734
F13D12.9	WBGene00008743
F13E9.16	WBGene00045209
F13E9.19	WBGene00194922
F13E9.5	WBGene00008754
F13E9.9	WBGene00008758
F13G11.2	WBGene00008772
F13H8.12	WBGene00017444
F13H8.8	WBGene00017441
F13H8.9	WBGene00017442
F14B8.6	WBGene00017448
F14D12.4	WBGene00003166
F14D2.7	WBGene00017455
F14D7.1	WBGene00008788
F14D7.10	WBGene00008797
F14D7.7	WBGene00008794
F14E5.3	WBGene00008801
F14E5.4	WBGene00008802
F14E5.6	WBGene00008804
F14E5.8	WBGene00195147
F14F7.2	WBGene00008809
F14F7.4	WBGene00008811
F14H12.1	WBGene00000738
F14H3.2	WBGene00008821
F14H8.8	WBGene00077582
F15A2.6	WBGene00004719
F15A4.5	WBGene00008840
F15D3.4	WBGene00008854
F15D3.9	WBGene00077557
F15D4.6	WBGene00008863
F15D4.8	WBGene00001459
F15G9.1	WBGene00008865
F15H10.4	WBGene00008871
F15H10.7	WBGene00008874
F15H9.1	WBGene00008870
F16C3.4	WBGene00044243
F16F9.1	WBGene00017513
F16G10.2	WBGene00017517
F16G10.5	WBGene00017520
F16G10.6	WBGene00017521
F17A2.3	WBGene00008902
F17A9.4	WBGene00017536
F17C11.17	WBGene00077761
F17C8.4	WBGene00004311
F17C8.5	WBGene00006661
F17C8.7	WBGene00008912
F17E9.12	WBGene00001905
F17E9.3	WBGene00017540
F17E9.5	WBGene00017542
F17E9.9	WBGene00001908
F18A1.1	WBGene00017545
F18A12.1	WBGene00017550
F18A12.2	WBGene00017551
F18A12.3	WBGene00017552
F18A12.4	WBGene00017553
F18A12.5	WBGene00017554
F18A12.6	WBGene00017555
F18A12.8	WBGene00017557
F18C12.1	WBGene00000485
F18C12.4	WBGene00008935
F18C5.4	WBGene00017559
F18E2.4	WBGene00008937
F18E9.7	WBGene00017573
F19B6.3	WBGene00008949
F19B6.4	WBGene00008950
F19C7.5	WBGene00017595
F19G12.9	WBGene00195185
F19H6.1	WBGene00008956
F19H8.1	WBGene00006603
F20A1.6	WBGene00017618
F20B6.1	WBGene00017627
F20D6.1	WBGene00017633
F20D6.11	WBGene00017640
F20D6.6	WBGene00017636
F20G2.4	WBGene00003543
F20H11.4	WBGene00017647
F21A3.4	WBGene00008994
F21A9.2	WBGene00017651
F21C10.9	WBGene00017658
F21C3.6	WBGene00009005
F21C3.7	WBGene00077548
F21D9.2	WBGene00009016
F21D9.3	WBGene00009017
F21F3.2	WBGene00017672
F21F3.3	WBGene00017673
F21F8.11	WBGene00017681
F21F8.5	WBGene00017679
F21H7.2	WBGene00009028
F21H7.5	WBGene00009031
F22B3.8	WBGene00009039
F22B5.4	WBGene00009042
F22B5.5	WBGene00009043
F22B7.3	WBGene00017694
F22B7.9	WBGene00017698
F22D3.4	WBGene00017700
F22D6.1	WBGene00002198
F22E10.5	WBGene00009057
F22E5.1	WBGene00017703
F23B12.1	WBGene00009079
F23B12.4	WBGene00009081
F23B2.7	WBGene00009075
F23C8.1	WBGene00017731
F23C8.7	WBGene00017736
F25B3.4	WBGene00009101
F25B3.5	WBGene00009102
F25B5.1	WBGene00017773
F25D1.4	WBGene00009109
F25E2.2	WBGene00017780
F25E5.10	WBGene00017791
F25E5.4	WBGene00017785
F25E5.7	WBGene00017788
F25F2.1	WBGene00009115
F25G6.1	WBGene00017796
F25H5.2	WBGene00009125
F25H5.7	WBGene00009129
F25H5.8	WBGene00009130
F25H8.3	WBGene00001650
F25H8.7	WBGene00004974
F26A1.10	WBGene00017808
F26A1.3	WBGene00017802
F26A1.4	WBGene00017803
F26A3.5	WBGene00009143
F26B1.1	WBGene00017815
F26B1.5	WBGene00017817
F26B1.7	WBGene00002601
F26B1.8	WBGene00194703
F26D10.13	WBGene00044244
F26D11.12	WBGene00045392
F26D11.4	WBGene00017821
F26D11.6	WBGene00017823
F26D2.10	WBGene00009149
F26D2.16	WBGene00009154
F26E4.5	WBGene00009160
F26F12.2	WBGene00017833
F26F2.11	WBGene00195158
F26F4.2	WBGene00005012
F26G1.4	WBGene00017840
F26G1.5	WBGene00017841
F26G1.7	WBGene00003424
F26H9.8	WBGene00009178
F27C1.1	WBGene00017851
F27C1.3	WBGene00017853
F27C8.1	WBGene00000002
F27C8.5	WBGene00009185
F27D4.6	WBGene00009190
F27D9.2	WBGene00017861
F27D9.7	WBGene00017865
F27E5.3	WBGene00009193
F28A10.1	WBGene00017869
F28A10.2	WBGene00017870
F28A10.3	WBGene00017871
F28A10.4	WBGene00017872
F28A10.7	WBGene00017875
F28B1.1	WBGene00009195
F28B1.2	WBGene00009196
F28B1.9	WBGene00045381
F28B12.2	WBGene00001208
F28B12.6	WBGene00206371
F28E10.4	WBGene00017902
F28F5.3	WBGene00017904
F28F8.8	WBGene00009225
F28F9.3	WBGene00017907
F28H1.5	WBGene00017910
F28H7.4	WBGene00009238
F28H7.6	WBGene00009239
F29B9.5	WBGene00017921
F29B9.7	WBGene00017922
F29D10.1	WBGene00009250
F30A10.12	WBGene00009269
F30F8.10	WBGene00009277
F30F8.2	WBGene00009271
F31B9.2	WBGene00009279
F31C3.6	WBGene00009288
F31D4.7	WBGene00006687
F31D5.2	WBGene00017945
F31E8.2	WBGene00004921
F31E8.5	WBGene00017955
F31F6.7	WBGene00009303
F32A11.3	WBGene00009308
F32A5.4	WBGene00017970
F32A5.5	WBGene00000169
F32A5.6	WBGene00004198
F32B4.2	WBGene00009313
F32B5.4	WBGene00017978
F32B6.10	WBGene00009324
F32B6.4	WBGene00009321
F32B6.5	WBGene00006056
F32B6.6	WBGene00003464
F32B6.7	WBGene00006049
F32D1.11	WBGene00044530
F32H2.12	WBGene00050880
F32H2.7	WBGene00009344
F33D11.1	WBGene00018000
F33D11.2	WBGene00018001
F33D11.7	WBGene00018004
F33D4.3	WBGene00001456
F33E2.7	WBGene00009363
F34D10.3	WBGene00009373
F34D10.8	WBGene00009377
F34D10.9	WBGene00045484
F34D6.7	WBGene00044364
F34D6.8	WBGene00044365
F34D6.9	WBGene00044366
F35A5.2	WBGene00018025
F35C11.2	WBGene00009401
F35C11.3	WBGene00009402
F35C12.3	WBGene00009408
F35C5.1	WBGene00009390
F35E2.5	WBGene00009412
F35E2.6	WBGene00009413
F35E2.9	WBGene00009416
F35F10.4	WBGene00018054
F35F11.2	WBGene00018065
F35H10.11	WBGene00001903
F35H10.2	WBGene00018068
F35H10.4	WBGene00006914
F35H8.1	WBGene00009446
F35H8.4	WBGene00009449
F36A2.10	WBGene00009457
F36A2.11	WBGene00009458
F36A2.12	WBGene00009459
F36A2.14	WBGene00023490
F36A2.3	WBGene00009453
F36A4.1	WBGene00018080
F36A4.2	WBGene00018081
F36A4.3	WBGene00018082
F36A4.4	WBGene00018083
F36D1.4	WBGene00009463
F36D1.6	WBGene00009465
F36D1.7	WBGene00009466
F36D3.4	WBGene00009470
F36D3.5	WBGene00009471
F36D3.8	WBGene00009473
F36D4.1	WBGene00018087
F36F12.6	WBGene00018097
F36F12.7	WBGene00018098
F36F2.2	WBGene00009476
F36G9.13	WBGene00009489
F36G9.15	WBGene00009491
F36H1.3	WBGene00009492
F36H12.10	WBGene00018124
F36H12.11	WBGene00018125
F36H12.13	WBGene00018126
F36H12.14	WBGene00018127
F36H12.3	WBGene00018119
F36H12.4	WBGene00018120
F36H12.5	WBGene00018121
F36H12.7	WBGene00003426
F36H12.8	WBGene00018122
F36H12.9	WBGene00018123
F36H2.4	WBGene00044247
F36H2.6	WBGene00194653
F37A4.4	WBGene00018134
F37A4.5	WBGene00018135
F37A8.1	WBGene00009501
F37A8.2	WBGene00009502
F37A8.4	WBGene00003748
F37C12.18	WBGene00044005
F37C12.21	WBGene00194742
F37C4.3	WBGene00018143
F37C4.7	WBGene00018147
F37C4.8	WBGene00018148
F37D6.3	WBGene00009509
F37D6.6	WBGene00006445
F37E3.3	WBGene00018158
F37H8.4	WBGene00009513
F37H8.5	WBGene00009514
F38A5.11	WBGene00018168
F38A5.3	WBGene00002274
F38A5.6	WBGene00018163
F38A5.8	WBGene00018165
F38A6.1	WBGene00004013
F38E1.10	WBGene00018182
F38E1.3	WBGene00018178
F38H4.4	WBGene00009548
F38H4.5	WBGene00009549
F38H4.6	WBGene00009550
F39B2.1	WBGene00009553
F39C12.2	WBGene00000072
F39E9.4	WBGene00018196
F39H2.1	WBGene00009562
F40E12.2	WBGene00018235
F40E3.5	WBGene00018232
F40E3.7	WBGene00077781
F40F11.4	WBGene00009589
F40F12.1	WBGene00009590
F40F12.3	WBGene00009592
F40F12.7	WBGene00009595
F40F9.2	WBGene00006470
F40F9.3	WBGene00009581
F40F9.5	WBGene00009582
F40G12.10	WBGene00009605
F40G12.5	WBGene00009600
F40G9.14	WBGene00018248
F40G9.15	WBGene00077531
F40G9.7	WBGene00018243
F40H6.1	WBGene00018253
F40H6.2	WBGene00018254
F40H6.5	WBGene00018255
F41B5.6	WBGene00018263
F41C3.11	WBGene00018275
F41C3.8	WBGene00018274
F41D3.4	WBGene00009609
F41D3.6	WBGene00009611
F41E6.1	WBGene00018284
F41E7.5	WBGene00009621
F41F3.1	WBGene00018296
F41F3.4	WBGene00000712
F41G3.4	WBGene00001424
F41G3.5	WBGene00018301
F41H10.12	WBGene00018322
F41H10.2	WBGene00018315
F41H10.5	WBGene00018318
F42A10.3	WBGene00018340
F42A6.4	WBGene00018326
F42A9.3	WBGene00018332
F42A9.7	WBGene00018336
F42C5.4	WBGene00018346
F42C5.5	WBGene00018347
F42G2.3	WBGene00018352
F42G4.2	WBGene00009641
F42G4.6	WBGene00009643
F42G4.7	WBGene00009644
F42G8.7	WBGene00018358
F42G8.8	WBGene00018359
F42G8.9	WBGene00018360
F42H11.1	WBGene00009646
F43C11.1	WBGene00018378
F43C11.12	WBGene00018389
F43C11.2	WBGene00018379
F43E2.6	WBGene00018394
F43G6.11	WBGene00009663
F43G6.6	WBGene00005013
F43G9.6	WBGene00001414
F43G9.8	WBGene00009670
F44B9.9	WBGene00018410
F44C8.1	WBGene00018413
F44D12.16	WBGene00194914
F44D12.3	WBGene00009680
F44D12.4	WBGene00009681
F44D12.5	WBGene00009682
F44D12.6	WBGene00009683
F44D12.7	WBGene00009684
F44D12.8	WBGene00009685
F44E5.15	WBGene00206377
F44E7.3	WBGene00018425
F44E7.6	WBGene00018428
F44F1.3	WBGene00009695
F44F4.10	WBGene00009705
F44F4.15	WBGene00194850
F44F4.3	WBGene00009702
F44F4.9	WBGene00009704
F44G3.7	WBGene00009708
F44G4.5	WBGene00009714
F45C12.9	WBGene00018440
F45D11.8	WBGene00018454
F45E4.1	WBGene00000190
F45E4.6	WBGene00018471
F45F2.3	WBGene00001879
F45H7.6	WBGene00009738
F46A8.10	WBGene00009753
F46A8.6	WBGene00009749
F46A9.1	WBGene00009754
F46A9.2	WBGene00009755
F46B3.18	WBGene00050892
F46B3.3	WBGene00009758
F46B3.4	WBGene00009759
F46B6.13	WBGene00044192
F46B6.9	WBGene00009774
F46C5.6	WBGene00009781
F46C5.7	WBGene00009782
F46E10.18	WBGene00206358
F46F5.1	WBGene00018493
F46F5.11	WBGene00018502
F46F5.13	WBGene00018504
F46F5.14	WBGene00018505
F46F5.16	WBGene00018507
F46F5.4	WBGene00018495
F46F5.5	WBGene00018496
F46F5.6	WBGene00018497
F46F5.7	WBGene00018498
F46F5.9	WBGene00018500
F46G10.2	WBGene00009797
F47B3.1	WBGene00018525
F47B3.2	WBGene00018526
F47B3.4	WBGene00018528
F47B3.5	WBGene00018529
F47B3.6	WBGene00018530
F47B3.7	WBGene00018531
F47B8.11	WBGene00006057
F47B8.2	WBGene00009803
F47B8.8	WBGene00009809
F47C12.4	WBGene00018548
F47D12.7	WBGene00018563
F47F6.4	WBGene00018574
F47F6.5	WBGene00018575
F47G3.4	WBGene00194641
F47G6.3	WBGene00018580
F48A11.1	WBGene00000497
F48A11.5	WBGene00018586
F48A9.3	WBGene00006624
F48C1.1	WBGene00018594
F48C1.7	WBGene00004965
F48E8.4	WBGene00018611
F49C12.15	WBGene00009884
F49C5.10	WBGene00044162
F49D11.7	WBGene00018631
F49E11.7	WBGene00009893
F49E12.4	WBGene00006719
F49F1.12	WBGene00018652
F49H6.1	WBGene00009905
F52C12.4	WBGene00018681
F52E4.5	WBGene00018702
F52F12.5	WBGene00009938
F52F12.8	WBGene00009941
F52F12.9	WBGene00009942
F52H3.6	WBGene00009948
F53A2.3	WBGene00009951
F53A2.9	WBGene00009953
F53B2.5	WBGene00009956
F53B2.8	WBGene00009957
F53B6.1	WBGene00006641
F53B6.4	WBGene00009959
F53B6.7	WBGene00009962
F53B6.9	WBGene00009964
F53B7.5	WBGene00009968
F53C11.9	WBGene00044921
F53C3.1	WBGene00018745
F53F4.18	WBGene00077569
F53G12.6	WBGene00004962
F53G12.8	WBGene00018773
F54A3.4	WBGene00018783
F54B3.2	WBGene00010014
F54C1.8	WBGene00018792
F54C1.9	WBGene00006058
F54C8.1	WBGene00010035
F54C9.14	WBGene00175035
F54D1.1	WBGene00010046
F54D1.2	WBGene00000700
F54D1.3	WBGene00000701
F54D10.2	WBGene00018803
F54D12.9	WBGene00018822
F54D7.4	WBGene00006984
F54E12.1	WBGene00001929
F54F12.1	WBGene00010072
F54H12.7	WBGene00044633
F54H12.8	WBGene00045247
F54H5.2	WBGene00018839
F54H5.3	WBGene00018840
F54H5.5	WBGene00018841
F55A11.6	WBGene00010079
F55A12.7	WBGene00000150
F55A12.9	WBGene00004131
F55A3.7	WBGene00018852
F55B11.1	WBGene00010083
F55B11.7	WBGene00045060
F55C12.2	WBGene00018870
F55C5.1	WBGene00010091
F55D10.1	WBGene00018877
F55D12.6	WBGene00010114
F55F10.3	WBGene00050916
F55F8.7	WBGene00018895
F55G11.1	WBGene00010122
F55G11.10	WBGene00010129
F55G7.5	WBGene00195215
F55H12.1	WBGene00004901
F55H12.5	WBGene00010136
F55H2.5	WBGene00010131
F56A11.6	WBGene00018926
F56A4.7	WBGene00018915
F56B3.6	WBGene00018930
F56C11.6	WBGene00018958
F56C3.8	WBGene00018945
F56C9.5	WBGene00018949
F56D2.8	WBGene00018968
F56D5.2	WBGene00010147
F56D6.12	WBGene00044474
F56D6.13	WBGene00044475
F56D6.14	WBGene00044476
F56F3.2	WBGene00003577
F56F3.4	WBGene00010155
F56F4.1	WBGene00018978
F56F4.3	WBGene00018980
F56F4.4	WBGene00018981
F56F4.9	WBGene00050896
F56G4.7	WBGene00044250
F56H1.10	WBGene00206363
F56H1.3	WBGene00018994
F56H11.3	WBGene00001245
F56H6.6	WBGene00010167
F57A10.2	WBGene00010184
F57A8.6	WBGene00010181
F57B1.5	WBGene00010188
F57B1.6	WBGene00010189
F57B9.8	WBGene00018999
F57C9.6	WBGene00019012
F57F4.1	WBGene00019015
F57H12.5	WBGene00019020
F58A6.5	WBGene00019024
F58A6.8	WBGene00003438
F58A6.9	WBGene00019026
F58B3.1	WBGene00003093
F58B4.7	WBGene00077682
F58D2.2	WBGene00010241
F58D2.5	WBGene00206469
F58D5.6	WBGene00010245
F58D5.7	WBGene00010246
F58D5.8	WBGene00010247
F58E2.3	WBGene00019047
F58E6.12	WBGene00077696
F58E6.5	WBGene00010254
F58F12.2	WBGene00019062
F58F12.3	WBGene00019063
F58G1.3	WBGene00010265
F58G1.9	WBGene00010271
F58H1.6	WBGene00010289
F58H7.7	WBGene00019072
F58H7.8	WBGene00019073
F59A1.15	WBGene00010300
F59A1.16	WBGene00010301
F59A1.6	WBGene00010292
F59A3.13	WBGene00194697
F59A3.6	WBGene00019079
F59A3.7	WBGene00019080
F59A3.8	WBGene00019081
F59A6.12	WBGene00044665
F59A6.2	WBGene00019084
F59A6.4	WBGene00019086
F59A7.2	WBGene00019090
F59A7.7	WBGene00019094
F59A7.9	WBGene00019096
F59B10.1	WBGene00004134
F59B2.15	WBGene00185006
F59C6.2	WBGene00010323
F59C6.3	WBGene00010324
F59C6.6	WBGene00003742
F59C6.8	WBGene00010327
F59G1.2	WBGene00006644
F59H6.4	WBGene00019135
F59H6.5	WBGene00019136
H01G02.1	WBGene00010348
H01G02.4	WBGene00045108
H03G16.5	WBGene00010361
H04J21.1	WBGene00019150
H04M03.1	WBGene00019151
H04M03.11	WBGene00019155
H04M03.4	WBGene00019154
H05B21.4	WBGene00005891
H05C05.4	WBGene00194747
H05L14.1	WBGene00010366
H06H21.8	WBGene00019164
H06H21.9	WBGene00019165
H06I04.5	WBGene00019169
H08M01.1	WBGene00010373
H12D21.1	WBGene00010377
H12D21.12	WBGene00044271
H12D21.13	WBGene00044272
H12D21.14	WBGene00044273
H12D21.15	WBGene00044274
H12D21.2	WBGene00010378
H12D21.3	WBGene00010379
H12D21.5	WBGene00010381
H12I13.1	WBGene00019190
H12I13.6	WBGene00019194
H14E04.1	WBGene00019198
H14E04.3	WBGene00019200
H14N18.1	WBGene00006760
H20E11.3	WBGene00019215
H20J04.1	WBGene00019216
H23L24.1	WBGene00019228
H23L24.2	WBGene00019229
H24G06.1	WBGene00019237
H27M09.5	WBGene00019248
H32C10.1	WBGene00019255
H32C10.2	WBGene00003019
H32C10.3	WBGene00019257
H32K16.2	WBGene00010422
H34I24.1	WBGene00019260
H38K22.6	WBGene00044911
H38K22.7	WBGene00044912
K01A11.4	WBGene00004976
K01A2.10	WBGene00019284
K01A2.4	WBGene00019279
K01A6.5	WBGene00010447
K01B6.1	WBGene00010453
K01C8.2	WBGene00010457
K01C8.8	WBGene00010460
K01D12.1	WBGene00010461
K01D12.7	WBGene00010466
K01H12.2	WBGene00010485
K01H12.4	WBGene00010486
K02A11.2	WBGene00010487
K02D10.2	WBGene00019302
K02D10.3	WBGene00019303
K02D7.1	WBGene00019298
K02D7.5	WBGene00019300
K02E11.1	WBGene00010510
K02F6.1	WBGene00019335
K02F6.3	WBGene00019337
K02F6.4	WBGene00019338
K02F6.9	WBGene00019343
K03B4.6	WBGene00019356
K03B8.5	WBGene00003538
K03B8.9	WBGene00000951
K03E5.1	WBGene00019360
K03E5.2	WBGene00019361
K03H1.1	WBGene00001603
K03H1.10	WBGene00010545
K03H1.12	WBGene00010547
K03H1.3	WBGene00010538
K03H1.4	WBGene00010539
K03H1.6	WBGene00010541
K03H1.9	WBGene00010544
K03H4.2	WBGene00010549
K03H9.3	WBGene00019372
K04C2.8	WBGene00044312
K04D7.3	WBGene00001794
K04G11.3	WBGene00010571
K04G2.4	WBGene00010563
K04H4.5	WBGene00010574
K04H8.3	WBGene00010578
K05F1.1	WBGene00019405
K05F1.2	WBGene00003469
K05F1.3	WBGene00019406
K05F1.7	WBGene00003456
K05F1.8	WBGene00019409
K05F1.9	WBGene00019410
K06A1.2	WBGene00019425
K06A1.6	WBGene00019428
K06A4.3	WBGene00010593
K06A4.6	WBGene00010596
K06A5.3	WBGene00019431
K06B4.15	WBGene00077450
K06C4.13	WBGene00001901
K06C4.5	WBGene00001891
K06H7.8	WBGene00019459
K07A1.3	WBGene00010610
K07A1.4	WBGene00010611
K07A1.5	WBGene00010612
K07A12.5	WBGene00010623
K07A3.2	WBGene00004226
K07A3.3	WBGene00019461
K07E12.1	WBGene00000998
K07E12.2	WBGene00019501
K07E8.1	WBGene00019494
K07F5.1	WBGene00003467
K07F5.17	WBGene00045180
K07F5.2	WBGene00003425
K07F5.3	WBGene00003449
K07F5.4	WBGene00002206
K07F5.5	WBGene00010633
K07F5.6	WBGene00010634
K07F5.7	WBGene00010635
K07F5.8	WBGene00010636
K07F5.9	WBGene00006039
K07G5.4	WBGene00010643
K07H8.5	WBGene00019506
K07H8.7	WBGene00019507
K08A2.2	WBGene00019512
K08C9.1	WBGene00010650
K08C9.2	WBGene00010651
K08D10.7	WBGene00019530
K08D10.8	WBGene00019531
K08D9.4	WBGene00019525
K08E3.1	WBGene00010661
K08E3.10	WBGene00023451
K08E4.7	WBGene00045036
K08E7.4	WBGene00010672
K08F11.1	WBGene00019541
K08F4.5	WBGene00010679
K08F4.8	WBGene00003434
K08F8.3	WBGene00001505
K08F8.5	WBGene00010682
K08H2.9	WBGene00010694
K09B11.5	WBGene00010712
K09C4.9	WBGene00019553
K09C6.1	WBGene00019555
K09C6.2	WBGene00019556
K09C6.7	WBGene00019561
K09C6.8	WBGene00019562
K09C8.1	WBGene00003943
K09C8.2	WBGene00010715
K09D9.11	WBGene00019568
K09E10.1	WBGene00019579
K09E10.2	WBGene00019580
K09E4.1	WBGene00010719
K09E4.6	WBGene00010723
K09F6.3	WBGene00019586
K09F6.4	WBGene00019587
K09G1.2	WBGene00010728
K09H11.11	WBGene00044541
K10B3.1	WBGene00019609
K10C8.2	WBGene00010735
K10C9.7	WBGene00019626
K10D2.8	WBGene00189952
K10D6.2	WBGene00010742
K10D6.3	WBGene00010743
K10D6.4	WBGene00010744
K10G9.1	WBGene00010755
K10G9.2	WBGene00010756
K10H10.13	WBGene00194888
K10H10.7	WBGene00010763
K11C4.1	WBGene00019642
K11C4.2	WBGene00019643
K11D12.6	WBGene00019646
K11D12.8	WBGene00019648
K11D2.4	WBGene00010770
K11G12.4	WBGene00004876
K11G9.1	WBGene00019652
K11G9.5	WBGene00019655
K11H3.2	WBGene00010779
K12B6.2	WBGene00019667
K12C11.3	WBGene00019674
K12C11.5	WBGene00044896
K12C11.7	WBGene00045053
K12D12.4	WBGene00010786
K12H4.1	WBGene00000448
K12H4.6	WBGene00019681
K12H6.4	WBGene00019684
K12H6.5	WBGene00019685
K12H6.8	WBGene00019688
K12H6.9	WBGene00019689
M01A10.2	WBGene00006594
M01A12.4	WBGene00044616
M01E5.1	WBGene00010804
M01H9.4	WBGene00019720
M02A10.2	WBGene00002150
M02B1.4	WBGene00010829
M02B7.3	WBGene00003884
M02G9.4	WBGene00194935
M03E7.3	WBGene00019755
M03F8.2	WBGene00004206
M04G7.2	WBGene00019773
M05B5.1	WBGene00010869
M05B5.3	WBGene00010871
M05B5.7	WBGene00194654
M05D6.1	WBGene00010874
M05D6.3	WBGene00010876
M110.7	WBGene00010915
M117.4	WBGene00010920
M151.1	WBGene00019793
M162.7	WBGene00010933
M176.10	WBGene00010946
M195.4	WBGene00010949
M28.4	WBGene00010895
M28.9	WBGene00010900
M4.1	WBGene00019766
M7.7	WBGene00010883
M70.1	WBGene00019783
M70.2	WBGene00019784
M70.3	WBGene00019785
M70.5	WBGene00019787
M88.3	WBGene00010906
R01B10.3	WBGene00019805
R01H2.2	WBGene00019810
R01H2.4	WBGene00019812
R02D5.10	WBGene00194788
R02D5.7	WBGene00010980
R02F2.5	WBGene00019834
R03D7.5	WBGene00010991
R03D7.6	WBGene00001753
R03D7.8	WBGene00010992
R03H10.1	WBGene00019854
R03H10.4	WBGene00019856
R04B5.1	WBGene00011001
R04B5.11	WBGene00011008
R04B5.8	WBGene00005127
R05C11.4	WBGene00044467
R05D3.5	WBGene00019879
R05D7.1	WBGene00011026
R05D7.2	WBGene00011027
R05F9.13	WBGene00003429
R05F9.3	WBGene00003430
R05F9.8	WBGene00003431
R05G6.1	WBGene00019896
R05H5.2	WBGene00000389
R06A10.1	WBGene00019909
R06A10.5	WBGene00044895
R06B10.1	WBGene00019912
R06B9.2	WBGene00011053
R06B9.4	WBGene00011055
R07B7.4	WBGene00011088
R07C3.13	WBGene00019929
R07C3.4	WBGene00019920
R07E5.15	WBGene00011120
R07E5.6	WBGene00011114
R07H5.10	WBGene00011130
R07H5.9	WBGene00011129
R08A2.1	WBGene00011132
R08A2.2	WBGene00011133
R08A2.3	WBGene00011134
R08A2.9	WBGene00219318
R08C7.5	WBGene00019949
R08C7.6	WBGene00019950
R08C7.8	WBGene00019951
R08F11.2	WBGene00019966
R09A1.2	WBGene00019972
R09B5.1	WBGene00019976
R09B5.12	WBGene00019980
R09E10.1	WBGene00011171
R09E10.2	WBGene00011172
R09E10.3	WBGene00011173
R09E10.4	WBGene00011174
R09E10.6	WBGene00011176
R09H10.3	WBGene00011181
R102.10	WBGene00011297
R102.3	WBGene00011290
R102.4	WBGene00011291
R102.8	WBGene00011295
R105.1	WBGene00020084
R106.2	WBGene00020086
R10D12.1	WBGene00011185
R10D12.10	WBGene00011191
R10E4.3	WBGene00011200
R10E4.7	WBGene00011203
R10E9.2	WBGene00011214
R10E9.3	WBGene00011215
R10F2.6	WBGene00019997
R10H10.2	WBGene00004972
R11A8.8	WBGene00011241
R11E3.1	WBGene00020003
R11E3.4	WBGene00020006
R11G10.1	WBGene00000233
R11G10.4	WBGene00050968
R12B2.3	WBGene00020019
R12C12.1	WBGene00020022
R134.2	WBGene00001529
R13A1.1	WBGene00020041
R13A1.3	WBGene00020042
R13A5.10	WBGene00020052
R13A5.11	WBGene00020053
R13F6.5	WBGene00020066
R13G10.4	WBGene00011260
R13H4.2	WBGene00014826
R13H9.1	WBGene00020070
R13H9.2	WBGene00003450
R13H9.4	WBGene00003446
R13H9.5	WBGene00020071
R13H9.6	WBGene00020072
R148.7	WBGene00020105
R153.1	WBGene00020114
R155.2	WBGene00020116
R155.3	WBGene00020117
R155.4	WBGene00020118
R155.5	WBGene00189953
R166.5	WBGene00011304
T01A4.1	WBGene00020131
T01B11.4	WBGene00020140
T01C3.5	WBGene00011322
T01E8.9	WBGene00011336
T01H3.5	WBGene00011351
T02B11.9	WBGene00044777
T02B5.3	WBGene00011364
T02C12.1	WBGene00002038
T02C5.1	WBGene00020158
T02E1.1	WBGene00004966
T02E1.6	WBGene00011378
T02E1.7	WBGene00011379
T02E9.2	WBGene00001716
T02E9.6	WBGene00044203
T02H6.3	WBGene00020173
T02H6.4	WBGene00020174
T02H6.7	WBGene00020177
T02H6.9	WBGene00020179
T03D3.4	WBGene00005259
T03F1.5	WBGene00020187
T03F6.6	WBGene00011401
T04A6.3	WBGene00020202
T04A6.4	WBGene00194734
T04A8.13	WBGene00011414
T04B2.2	WBGene00001487
T04B2.5	WBGene00011423
T04B2.7	WBGene00011425
T04B2.8	WBGene00044018
T04C4.1	WBGene00020208
T04F3.1	WBGene00011436
T04F3.3	WBGene00011438
T04G9.6	WBGene00020217
T04H1.2	WBGene00011449
T04H1.7	WBGene00011452
T05A1.3	WBGene00011454
T05A1.5	WBGene00011456
T05A10.2	WBGene00000525
T05A7.10	WBGene00043986
T05A7.5	WBGene00020222
T05A7.6	WBGene00020223
T05A8.7	WBGene00020233
T05B4.14	WBGene00194894
T05C12.1	WBGene00011466
T05C12.3	WBGene00011467
T05C12.5	WBGene00011469
T05C12.9	WBGene00011472
T05D4.5	WBGene00011478
T05E11.2	WBGene00011479
T05E11.7	WBGene00011483
T05E8.1	WBGene00020262
T05F1.5	WBGene00011491
T05F1.8	WBGene00011493
T05G5.4	WBGene00011499
T05H4.2	WBGene00020265
T05H4.7	WBGene00020270
T06A4.2	WBGene00020282
T06C10.3	WBGene00020289
T06C10.6	WBGene00002208
T06D4.2	WBGene00020291
T06D4.3	WBGene00020292
T06D4.4	WBGene00020293
T06E4.5	WBGene00011533
T06G6.4	WBGene00011546
T06G6.8	WBGene00011549
T07D10.1	WBGene00011581
T07E3.2	WBGene00020313
T07F10.1	WBGene00011587
T08B1.5	WBGene00020342
T08B2.12	WBGene00020350
T08B2.15	WBGene00206356
T08B6.4	WBGene00020353
T08B6.9	WBGene00020356
T08G11.2	WBGene00044684
T08G11.5	WBGene00006765
T08G3.13	WBGene00011621
T08G3.7	WBGene00011619
T08H10.1	WBGene00020369
T08H10.3	WBGene00020370
T08H10.4	WBGene00020371
T09A12.1	WBGene00020372
T09A12.3	WBGene00003839
T09B4.3	WBGene00020377
T09B4.6	WBGene00020380
T09B4.7	WBGene00020381
T09B4.8	WBGene00020382
T09F5.10	WBGene00011669
T10B10.7	WBGene00003840
T10B10.9	WBGene00011685
T10B11.4	WBGene00020400
T10B11.5	WBGene00020401
T10B5.2	WBGene00020388
T10C6.13	WBGene00001876
T10C6.14	WBGene00001875
T10C6.3	WBGene00005934
T10D4.15	WBGene00077522
T10D4.4	WBGene00002114
T10D4.7	WBGene00020409
T10E9.4	WBGene00020414
T10E9.6	WBGene00020416
T10E9.9	WBGene00020419
T10H9.2	WBGene00004740
T11A5.6	WBGene00011705
T11B7.4	WBGene00001132
T11F8.4	WBGene00020435
T11F9.22	WBGene00194784
T11F9.4	WBGene00000007
T11G6.7	WBGene00011721
T13A10.1	WBGene00020468
T13A10.11	WBGene00006416
T13B5.5	WBGene00020472
T13B5.6	WBGene00020473
T13F2.10	WBGene00003466
T13F2.11	WBGene00003465
T13F2.12	WBGene00011749
T13F3.8	WBGene00044205
T13G4.7	WBGene00020494
T13H10.1	WBGene00002193
T13H5.2	WBGene00011756
T14A8.2	WBGene00020497
T14B1.2	WBGene00000085
T14D7.3	WBGene00044062
T14E8.1	WBGene00020504
T14G8.2	WBGene00011770
T15B12.2	WBGene00020531
T15B7.14	WBGene00020526
T15B7.16	WBGene00020528
T15B7.3	WBGene00000716
T15H9.4	WBGene00011789
T15H9.5	WBGene00011790
T16A1.2	WBGene00020533
T16A1.3	WBGene00020534
T16A1.5	WBGene00020536
T16A9.3	WBGene00011793
T16A9.4	WBGene00011794
T16A9.5	WBGene00011795
T16D1.2	WBGene00004023
T16G1.13	WBGene00194787
T16G12.3	WBGene00011804
T16G12.7	WBGene00011808
T16H12.1	WBGene00011811
T16H12.6	WBGene00002186
T19A5.4	WBGene00003634
T19B10.12	WBGene00050898
T19B10.2	WBGene00011831
T19B4.1	WBGene00020556
T19C3.5	WBGene00020563
T19C4.1	WBGene00011838
T19D12.5	WBGene00020580
T19H12.8	WBGene00020591
T20B6.1	WBGene00020597
T20D3.1	WBGene00011855
T20F5.5	WBGene00020627
T20H4.2	WBGene00020635
T20H9.6	WBGene00020642
T21C12.4	WBGene00011900
T21C12.8	WBGene00043998
T21E12.3	WBGene00020655
T21E12.5	WBGene00020656
T21E3.2	WBGene00020653
T21G5.1	WBGene00020659
T21G5.4	WBGene00020661
T22A3.12	WBGene00206474
T22A3.6	WBGene00011909
T22B11.1	WBGene00020675
T22B2.3	WBGene00020667
T22B3.2	WBGene00011910
T22B3.3	WBGene00011911
T22C1.12	WBGene00011921
T22C1.8	WBGene00011918
T22C1.9	WBGene00011919
T22C8.2	WBGene00011923
T22D1.11	WBGene00020688
T22D1.8	WBGene00020686
T22H6.6	WBGene00001560
T22H9.3	WBGene00020707
T23B3.3	WBGene00020711
T23B3.5	WBGene00020713
T23B7.1	WBGene00020715
T23B7.2	WBGene00044298
T23E1.3	WBGene00020730
T23F11.2	WBGene00011954
T23F4.5	WBGene00044430
T23F6.3	WBGene00011951
T23G11.1	WBGene00011968
T23G11.10	WBGene00011973
T24B8.4	WBGene00011978
T24E12.12	WBGene00044380
T24E12.9	WBGene00020776
T24H10.5	WBGene00012003
T25B9.10	WBGene00012016
T25B9.2	WBGene00012008
T25B9.4	WBGene00012010
T25B9.5	WBGene00012011
T25B9.6	WBGene00012012
T25D10.5	WBGene00020802
T25D3.3	WBGene00020797
T25E12.16	WBGene00194715
T26A5.1	WBGene00007060
T26A8.3	WBGene00020826
T26C12.2	WBGene00020832
T26E3.2	WBGene00003578
T26E3.6	WBGene00012039
T26E3.7	WBGene00012040
T26E4.14	WBGene00012054
T26H10.1	WBGene00000955
T26H10.2	WBGene00077782
T27A3.3	WBGene00006044
T27A3.4	WBGene00020840
T27A3.5	WBGene00020841
T27C10.7	WBGene00020860
T27C10.8	WBGene00077519
T27D12.2	WBGene00000528
T27E4.1	WBGene00020861
T27E4.6	WBGene00020864
T27E7.1	WBGene00012087
T27F6.1	WBGene00012102
T27F6.10	WBGene00077508
T28B8.3	WBGene00012114
T28B8.6	WBGene00044122
T28C12.2	WBGene00020889
T28C12.3	WBGene00020890
T28C6.1	WBGene00012118
T28C6.5	WBGene00012120
T28C6.8	WBGene00012122
T28D6.2	WBGene00006533
T28D6.7	WBGene00012127
T28D9.3	WBGene00020895
T28D9.9	WBGene00020898
T28F12.1	WBGene00020904
T28F2.1	WBGene00020900
T28F4.3	WBGene00012138
T28H11.1	WBGene00006053
T28H11.5	WBGene00006051
T28H11.6	WBGene00006040
T28H11.7	WBGene00020905
VY10G11R.1	WBGene00012159
W01A8.2	WBGene00012164
W01B11.1	WBGene00020913
W01B11.2	WBGene00020914
W01B11.6	WBGene00020917
W01B6.2	WBGene00012169
W01B6.4	WBGene00012171
W01B6.5	WBGene00012172
W01B6.6	WBGene00012173
W01B6.8	WBGene00012174
W01C9.2	WBGene00012176
W01C9.4	WBGene00012177
W01D2.3	WBGene00012180
W01F3.3	WBGene00012186
W02B12.1	WBGene00012201
W02B12.12	WBGene00012207
W02B12.13	WBGene00043534
W02B12.16	WBGene00195148
W02B12.7	WBGene00002227
W02C12.2	WBGene00020929
W02D7.12	WBGene00044356
W02D7.4	WBGene00020940
W02D9.5	WBGene00012211
W02G9.10	WBGene00219305
W02H5.8	WBGene00020962
W03A5.1	WBGene00020966
W03A5.6	WBGene00020970
W03B1.3	WBGene00020973
W03B1.5	WBGene00020974
W03B1.8	WBGene00020977
W03B1.9	WBGene00020978
W03C9.1	WBGene00012219
W03C9.8	WBGene00012223
W03D8.1	WBGene00020984
W03D8.10	WBGene00020991
W03D8.2	WBGene00020985
W03D8.5	WBGene00020987
W03D8.9	WBGene00020990
W03F11.3	WBGene00021006
W03F11.4	WBGene00021007
W03F8.10	WBGene00020998
W03F8.2	WBGene00020992
W03F9.3	WBGene00021001
W03G1.2	WBGene00021010
W03G9.5	WBGene00021016
W03G9.6	WBGene00003906
W04A4.4	WBGene00012233
W04E12.4	WBGene00012249
W04E12.5	WBGene00012250
W04H10.1	WBGene00021030
W05F2.2	WBGene00021034
W06A7.5	WBGene00012294
W06B11.3	WBGene00021060
W06D4.2	WBGene00012296
W06D4.3	WBGene00012297
W06F12.3	WBGene00012307
W06H8.4	WBGene00021067
W07G1.7	WBGene00012334
W07G4.6	WBGene00005652
W08D2.8	WBGene00002204
W08E3.4	WBGene00012345
W09B12.1	WBGene00000035
W09C3.2	WBGene00021110
W09C3.6	WBGene00021113
W09C3.8	WBGene00021115
W09C5.12	WBGene00194660
W09D10.5	WBGene00012363
W09D6.4	WBGene00012357
W09H1.1	WBGene00012372
Y102A5C.19	WBGene00013623
Y105C5A.26	WBGene00044263
Y105C5B.11	WBGene00013651
Y105C5B.17	WBGene00013656
Y105C5B.18	WBGene00013657
Y105E8A.13	WBGene00013673
Y105E8A.27	WBGene00013684
Y106G6A.4	WBGene00013696
Y106G6D.3	WBGene00013700
Y106G6D.4	WBGene00013701
Y106G6E.1	WBGene00013705
Y106G6G.1	WBGene00013710
Y106G6G.3	WBGene00013712
Y106G6G.4	WBGene00013713
Y106G6H.13	WBGene00013723
Y110A2AL.6	WBGene00022443
Y110A2AL.7	WBGene00022444
Y110A2AM.3	WBGene00022450
Y110A2AM.4	WBGene00022451
Y110A2AR.2	WBGene00006710
Y110A7A.2	WBGene00022454
Y110A7A.3	WBGene00006797
Y111B2A.27	WBGene00013744
Y111B2A.8	WBGene00013732
Y113G7A.10	WBGene00013747
Y113G7A.12	WBGene00013749
Y113G7C.1	WBGene00013771
Y116A8A.2	WBGene00013773
Y116A8A.4	WBGene00013775
Y116A8A.6	WBGene00013776
Y116A8A.7	WBGene00013777
Y116A8C.18	WBGene00013795
Y116A8C.23	WBGene00013800
Y116A8C.24	WBGene00013801
Y116A8C.3	WBGene00013784
Y116A8C.33	WBGene00013809
Y116A8C.37	WBGene00013810
Y116A8C.38	WBGene00013811
Y116A8C.4	WBGene00013785
Y116A8C.463	WBGene00194672
Y116A8C.465	WBGene00194957
Y116A8C.8	WBGene00013788
Y116F11B.14	WBGene00013829
Y116F11B.7	WBGene00013823
Y116F11B.8	WBGene00013824
Y119C1B.1	WBGene00022467
Y119C1B.11	WBGene00044441
Y119C1B.3	WBGene00022469
Y119D3B.17	WBGene00003978
Y119D3B.21	WBGene00022497
Y119D3B.22	WBGene00044675
Y17G7B.11	WBGene00012464
Y17G7B.19	WBGene00012470
Y18D10A.21	WBGene00012486
Y18D10A.23	WBGene00012487
Y18D10A.6	WBGene00003735
Y18H1A.1	WBGene00021207
Y18H1A.10	WBGene00021214
Y18H1A.11	WBGene00021215
Y18H1A.15	WBGene00044434
Y18H1A.8	WBGene00021212
Y19D10A.12	WBGene00021227
Y19D10A.4	WBGene00021219
Y1A5A.1	WBGene00012379
Y20F4.5	WBGene00021240
Y22D7AR.12	WBGene00021265
Y22D7AR.7	WBGene00021261
Y22F5A.3	WBGene00004364
Y22F5A.4	WBGene00003090
Y23H5A.4	WBGene00021271
Y23H5B.12	WBGene00194701
Y23H5B.2	WBGene00021273
Y23H5B.9	WBGene00021280
Y24D9B.1	WBGene00021287
Y25C1A.1	WBGene00021288
Y25C1A.10	WBGene00005179
Y25C1A.2	WBGene00021289
Y26D4A.12	WBGene00012509
Y26G10.6	WBGene00189931
Y27F2A.6	WBGene00021298
Y32B12A.4	WBGene00012519
Y32F6A.2	WBGene00004909
Y32F6A.4	WBGene00012529
Y32G9A.10	WBGene00021307
Y32G9A.3	WBGene00021302
Y37B11A.1	WBGene00021343
Y37D8A.16	WBGene00012554
Y37D8A.5	WBGene00012547
Y37D8A.8	WBGene00012549
Y37E11AL.12	WBGene00195010
Y37E11AL.2	WBGene00021358
Y37E11AL.4	WBGene00021360
Y37E11AR.4	WBGene00021371
Y37E11AR.7	WBGene00021373
Y37E11B.10	WBGene00021381
Y37E11B.7	WBGene00021379
Y37E11B.9	WBGene00021380
Y37E3.16	WBGene00021354
Y37E3.19	WBGene00044810
Y37F4.1	WBGene00021382
Y37F4.3	WBGene00021384
Y37F4.5	WBGene00021386
Y38A10A.1	WBGene00005098
Y38C1AA.7	WBGene00021398
Y38C1AB.4	WBGene00021406
Y38E10A.17	WBGene00012595
Y38F1A.1	WBGene00012605
Y38F1A.7	WBGene00012609
Y38F2AR.10	WBGene00021428
Y38F2AR.12	WBGene00021430
Y38H6C.1	WBGene00012615
Y38H6C.15	WBGene00012627
Y38H8A.2	WBGene00012636
Y38H8A.3	WBGene00012637
Y38H8A.4	WBGene00012638
Y39A1A.18	WBGene00012656
Y39A1A.2	WBGene00012642
Y39A3CR.8	WBGene00021447
Y39B6A.17	WBGene00003685
Y39B6A.18	WBGene00012679
Y39B6A.25	WBGene00012684
Y39B6A.30	WBGene00012689
Y39B6A.5	WBGene00012668
Y39B6A.7	WBGene00012669
Y39E4A.1	WBGene00012711
Y39E4B.11	WBGene00012720
Y39E4B.13	WBGene00012721
Y39E4B.6	WBGene00012717
Y39E4B.8	WBGene00006985
Y39F10A.3	WBGene00021454
Y39F10C.2	WBGene00194705
Y39F10C.3	WBGene00206368
Y39G10AR.15	WBGene00021471
Y39G10AR.16	WBGene00021472
Y39G10AR.25	WBGene00077563
Y39G8C.2	WBGene00012731
Y40B10A.4	WBGene00021489
Y40C5A.3	WBGene00021496
Y40H4A.2	WBGene00012741
Y40H7A.2	WBGene00012742
Y41C4A.1	WBGene00012749
Y41C4A.11	WBGene00012757
Y41C4A.18	WBGene00012761
Y41C4A.21	WBGene00194733
Y41C4A.5	WBGene00004165
Y41C4A.7	WBGene00012754
Y41E3.18	WBGene00044003
Y41E3.19	WBGene00044979
Y42A5A.1	WBGene00012776
Y42H9AR.2	WBGene00021537
Y43B11AR.1	WBGene00021543
Y43C5A.1	WBGene00012781
Y43C5A.4	WBGene00012784
Y43C5B.2	WBGene00012785
Y43C5B.3	WBGene00012786
Y43F4A.4	WBGene00012799
Y43F8A.2	WBGene00012809
Y43F8A.3	WBGene00012810
Y43F8C.13	WBGene00012834
Y43F8C.15	WBGene00012836
Y43F8C.23	WBGene00045344
Y43F8C.3	WBGene00012825
Y43F8C.5	WBGene00012827
Y43F8C.6	WBGene00012828
Y43F8C.9	WBGene00012831
Y44A6B.4	WBGene00012849
Y44A6D.5	WBGene00012855
Y44E3A.1	WBGene00021547
Y45F10B.3	WBGene00012871
Y45F10B.8	WBGene00012872
Y45F10B.9	WBGene00012873
Y45F10C.1	WBGene00012877
Y45F10C.6	WBGene00044256
Y45F10D.16	WBGene00044257
Y45F3A.1	WBGene00012859
Y45G12C.12	WBGene00006200
Y46C8AL.1	WBGene00021579
Y46C8AL.9	WBGene00021586
Y46G5A.10	WBGene00012901
Y46G5A.14	WBGene00012905
Y46G5A.22	WBGene00012912
Y46G5A.30	WBGene00004904
Y46G5A.34	WBGene00012919
Y46H3C.6	WBGene00021606
Y46H3D.1	WBGene00021608
Y47D3A.10	WBGene00006553
Y47D3A.11	WBGene00012925
Y47D3A.13	WBGene00012926
Y47D3A.15	WBGene00012928
Y47D3A.30	WBGene00001246
Y47D3A.31	WBGene00012937
Y47D3A.5	WBGene00012924
Y47D3B.5	WBGene00006683
Y47D7A.16	WBGene00044637
Y47D7A.17	WBGene00195160
Y47D9A.3	WBGene00021630
Y47D9A.4	WBGene00021631
Y47D9A.5	WBGene00021632
Y47G6A.13	WBGene00021639
Y47G6A.19	WBGene00021645
Y47G6A.26	WBGene00021650
Y47G6A.3	WBGene00021633
[truncated: 420 more rows]
